# Supplementary material for: Improved, Odorless Access to Benzo[1,2-d;4,5-d′]- bis[1,3]dithioles and Tert-butyl Arylsulfides via C-S Cross Coupling
Source: PubMed Central journal article supplement (PMC7464442; doi:10.3390/molecules25163666), 2020-08-12
Supplement: molecules-25-03666-s001.pdf [file molecules-25-03666-s001.pdf]

1 SUPPORTING INFORMATION

2

3 **Improved odorless access to benzo[1,2-d;4,5-d']bis[1,3]dithioles and *tert*-**  
4 **butyl arylsulfides via C-S cross coupling**

5 Kevin Kopp, Olav Schiemann, Nico Fleck\*

6 *Institute of Physical and Theoretical Chemistry, University of Bonn, Wegelerstr. 12, 53115 Bonn,*  
7 *Germany.*

8 *E-Mail: \*fleck@pc.uni-bonn.de*

9

10

|    |                                     |    |
|----|-------------------------------------|----|
| 1  | <b><u>Table of Contents</u></b>     |    |
| 2  |                                     |    |
| 3  | 1. Analytical data of products..... | 3  |
| 4  | 1.1 NMR spectroscopy.....           | 3  |
| 5  | 1.2 Mass spectrometry.....          | 8  |
| 6  | 2. Condition screening.....         | 12 |
| 7  | 2.2 <sup>1</sup> H-NMR data .....   | 14 |
| 8  | 3 Literature.....                   | 27 |
| 9  |                                     |    |
| 10 |                                     |    |

1 1. Analytical data of products

2 1.1 NMR spectroscopy

3

4

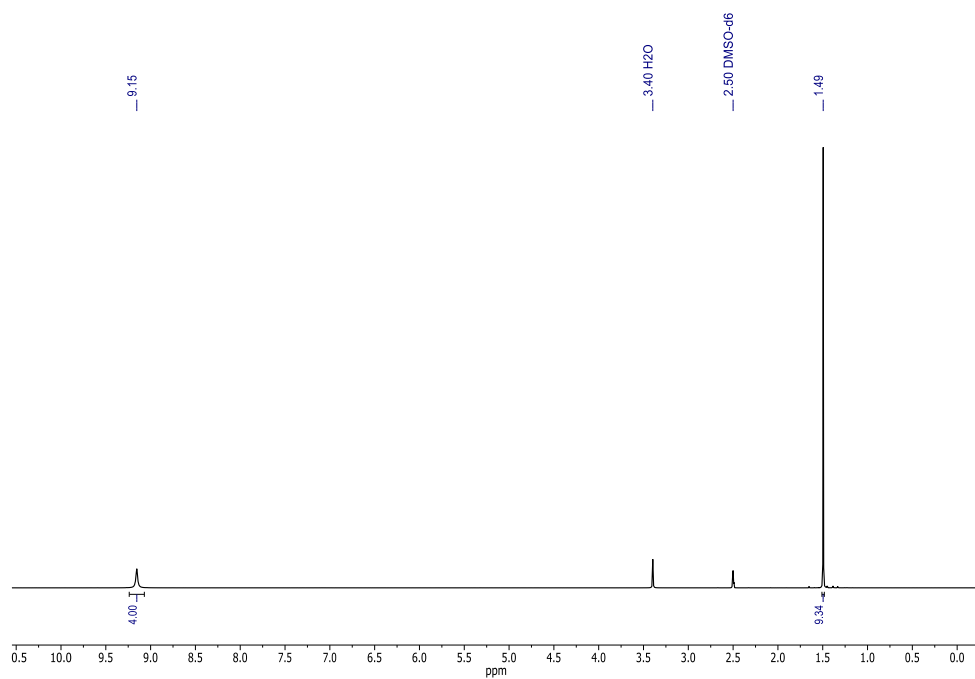

5

6 **Figure S1.**  $^1\text{H-NMR}$  (400 MHz, 298 K, DMSO- $d_6$ ) spectrum of S-*tert*-butyl isothiuronium bromide **6**.

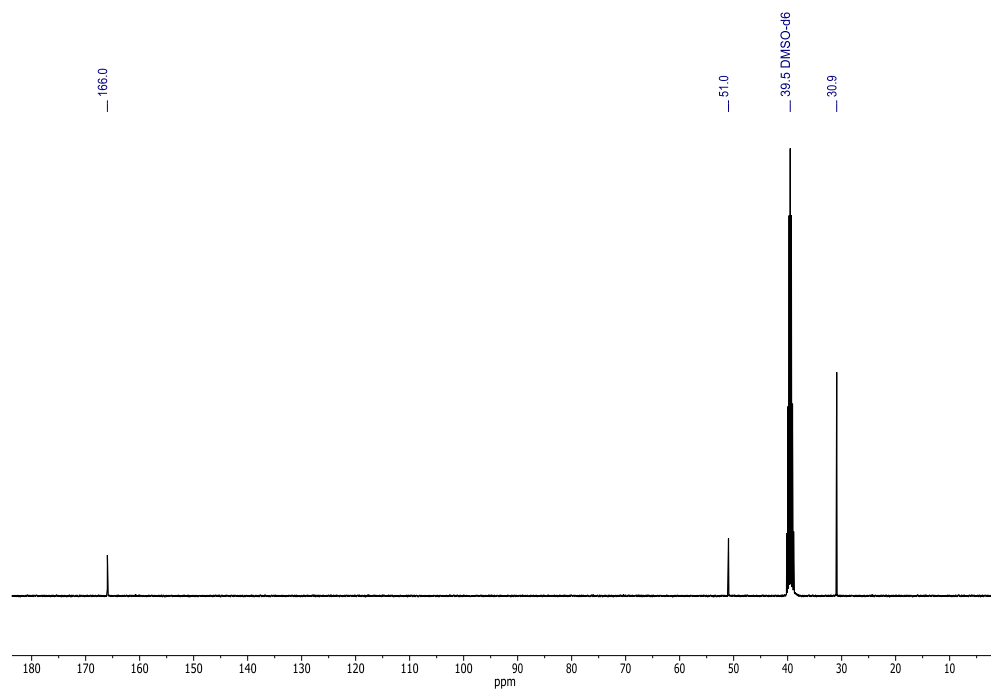

7

8 **Figure S2.**  $^{13}\text{C-NMR}$  (100 MHz, 298 K, DMSO- $d_6$ ) of S-*tert*-butyl isothiuronium bromide **6**.

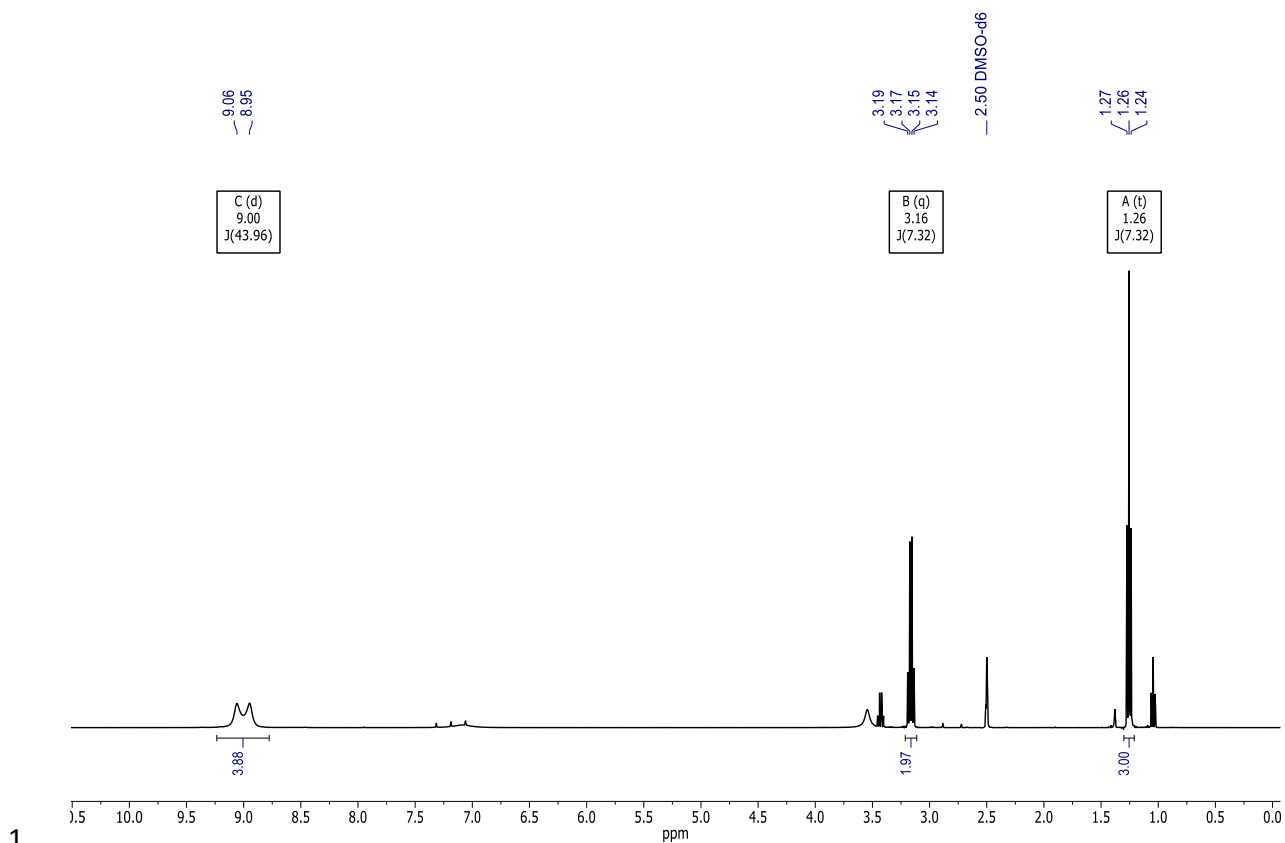

2 **Figure S3.**  $^1\text{H-NMR}$  (400 MHz, 298 K, DMSO- $d_6$ ) of reaction 2.1 when using EtOH as solvent.

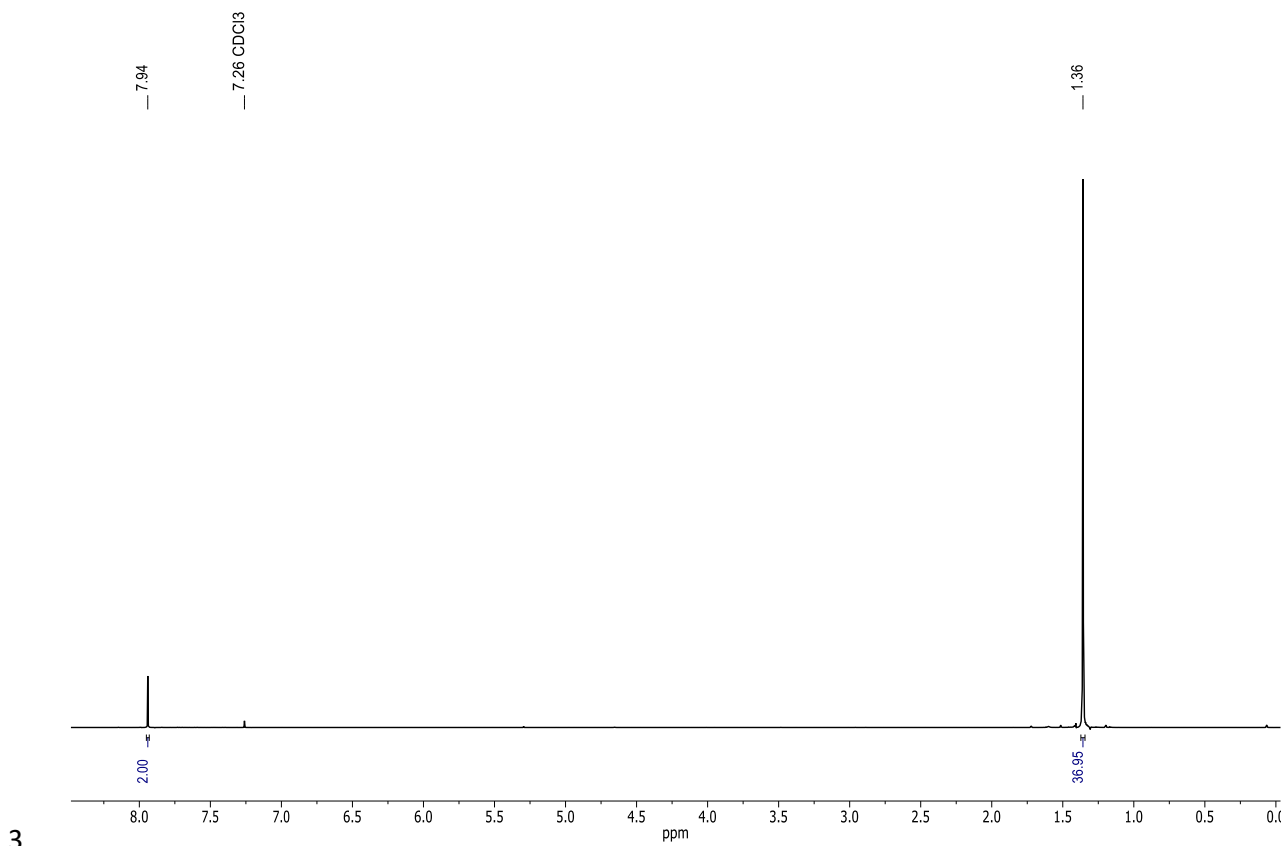

4 **Figure S4.**  $^1\text{H-NMR}$  (400 MHz, 298 K,  $\text{CDCl}_3$ ) of 1,2,4,5-Tetrakis(*tert*-butylthio)benzene **5**.

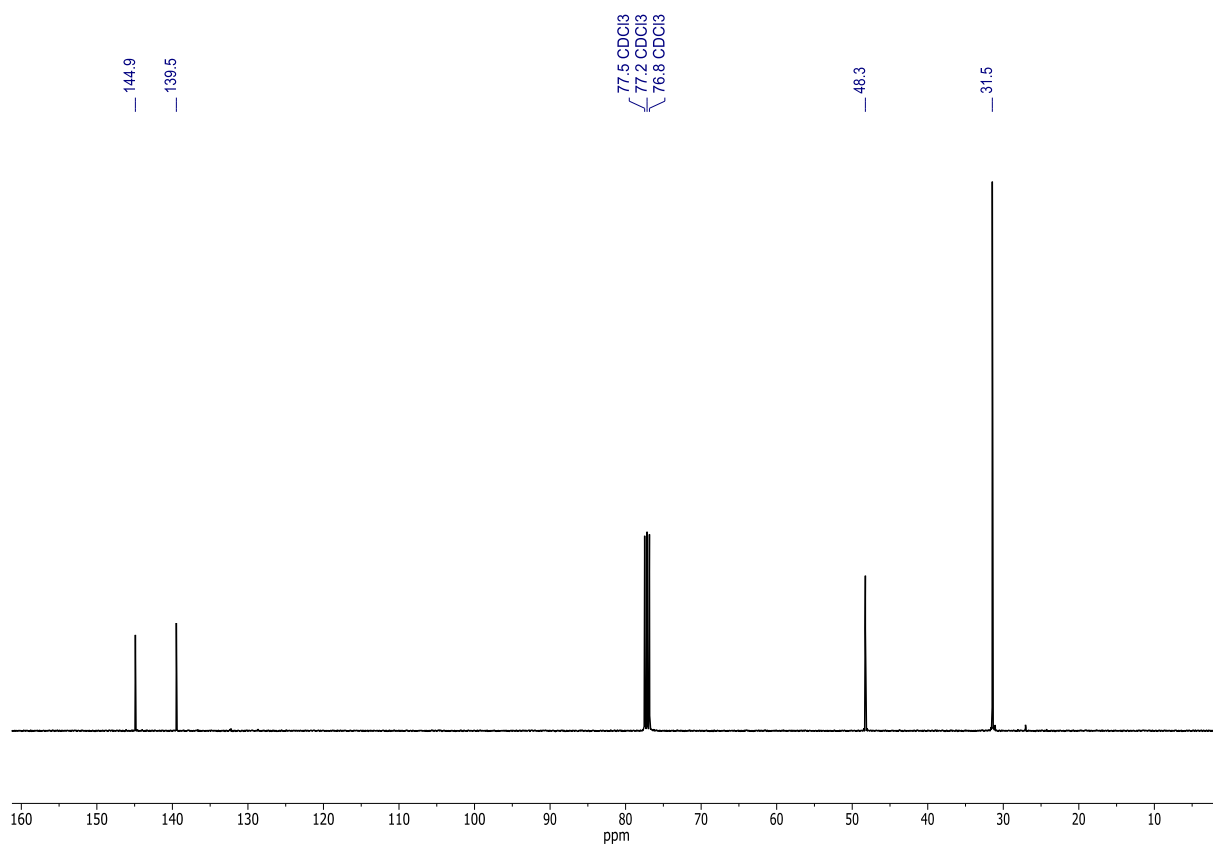

1

2 **Figure S5.**  $^{13}\text{C}$ -NMR (100 MHz, 298 K,  $\text{CDCl}_3$ ) of 1,2,4,5-Tetrakis(*tert*-butylthio)benzene **5**.

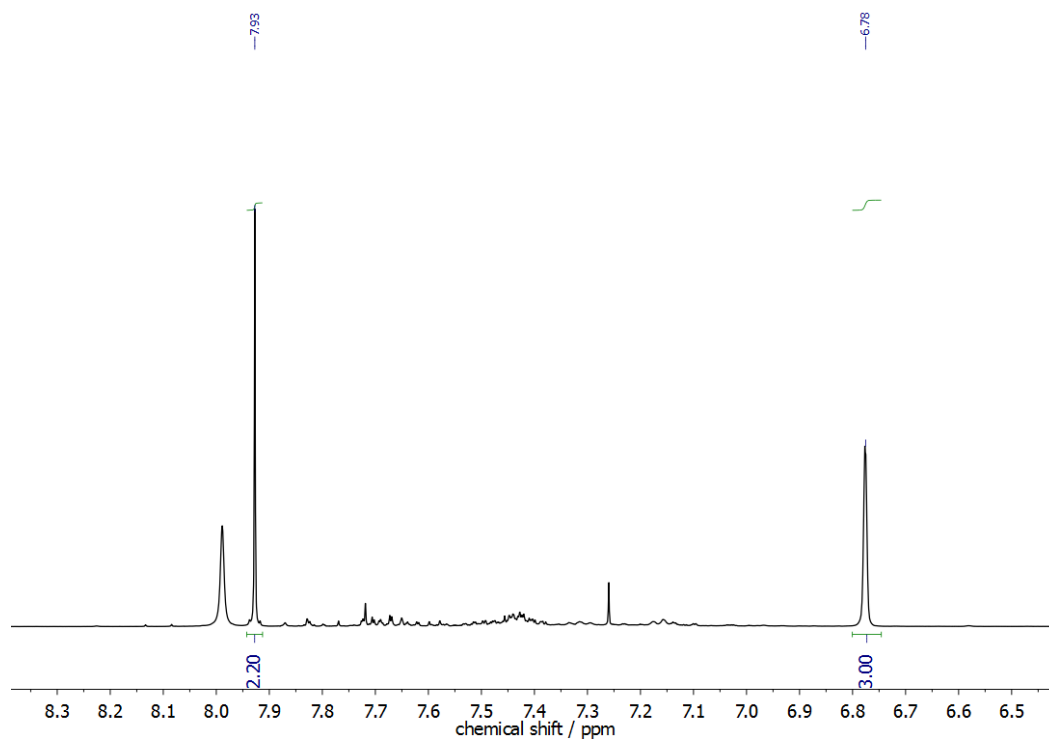

3

4 **Figure S6.**  $^1\text{H}$ -NMR (400 MHz, 298 K,  $\text{CDCl}_3$ ) of the reaction mixture converting 1,2,4,5-tetrabromobenzene to **5** containing mesitylene as an internal standard.

5

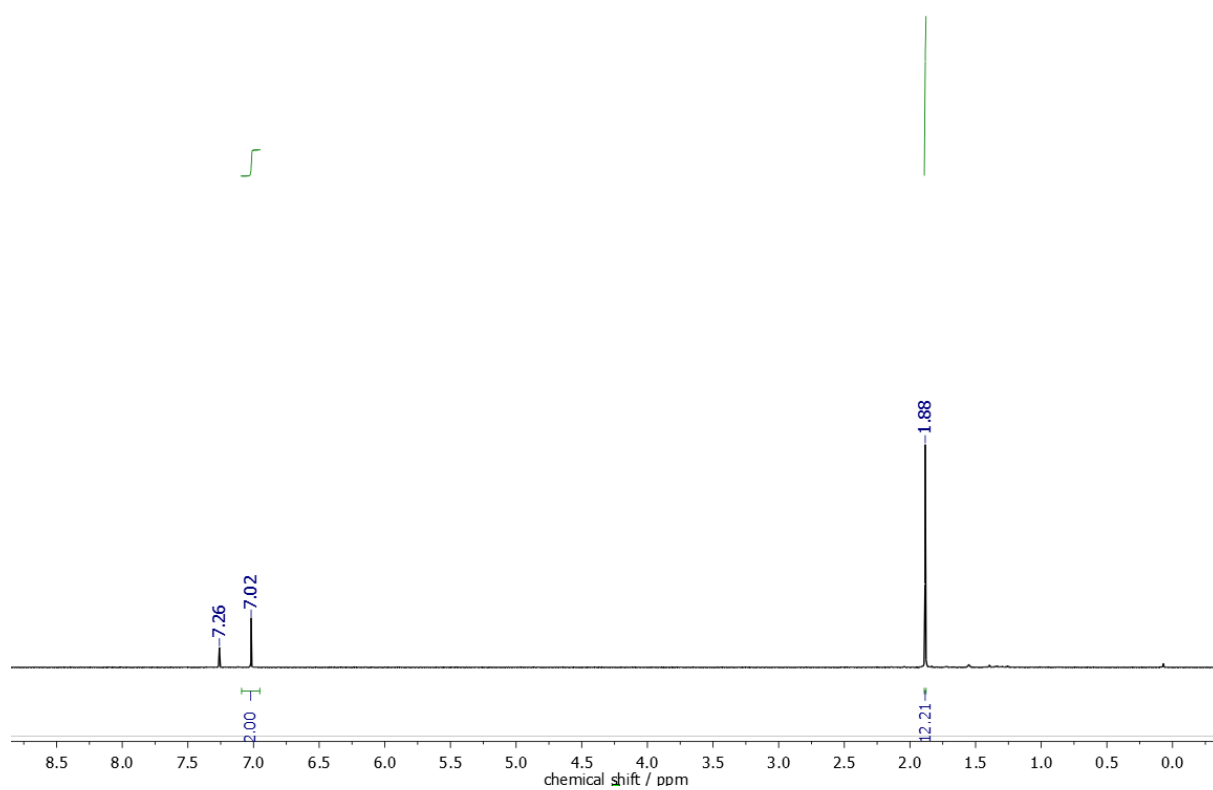

2 **Figure S7.**  $^1\text{H-NMR}$  (400 MHz, 298 K,  $\text{CDCl}_3$ ) of **1a**.

3

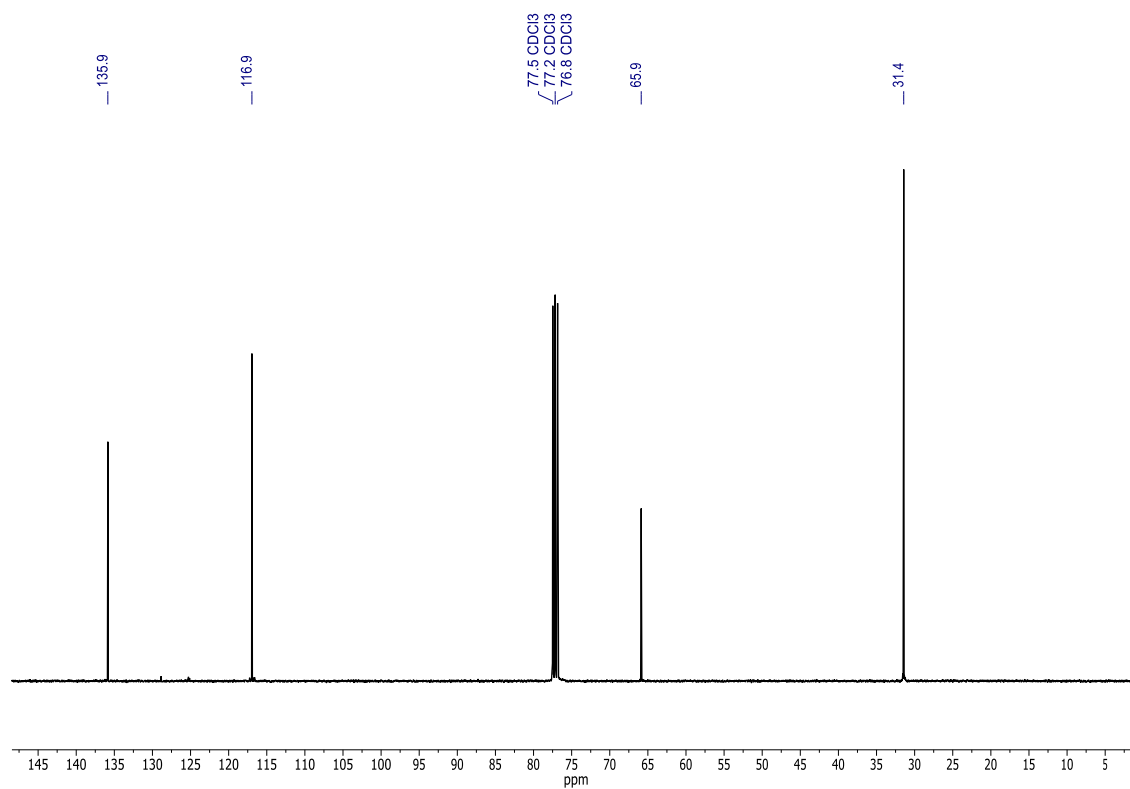

5 **Figure S8.**  $^{13}\text{C-NMR}$  (100 MHz, 298 K,  $\text{CDCl}_3$ ) of **1a**.

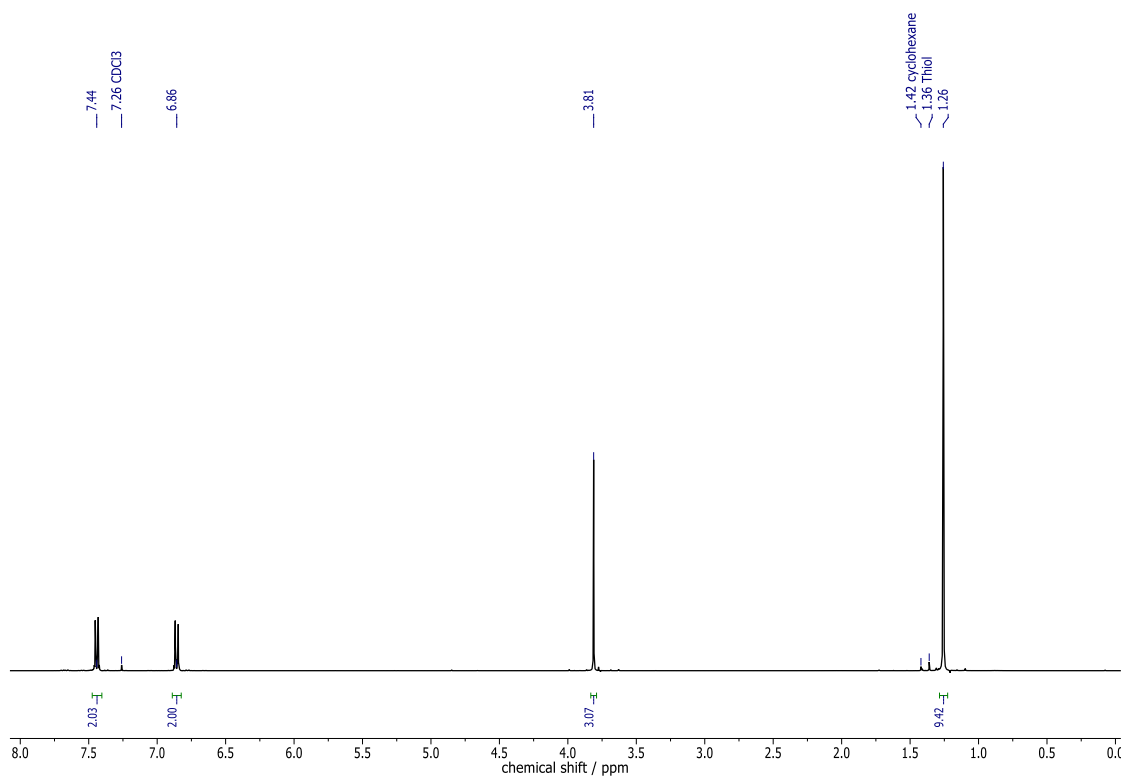

2 **Figure S9.**  $^1\text{H-NMR}$  (400 MHz, 298 K,  $\text{CDCl}_3$ ) of 4-methoxy-*tert*-butylthiobenzene **7**.

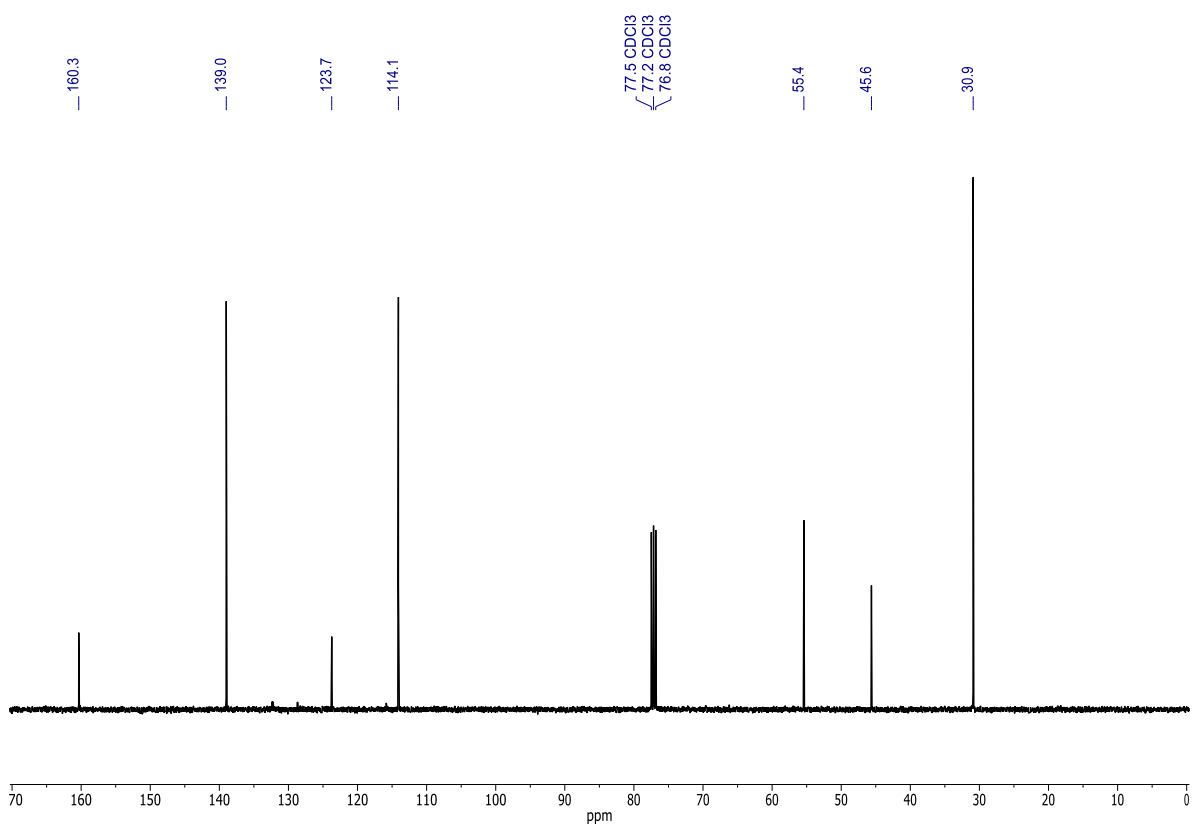

4 **Figure S10.**  $^{13}\text{C-NMR}$  of 4-methoxy-*tert*-butylthiobenzene **7**.

1 1.2 Mass spectrometry

2

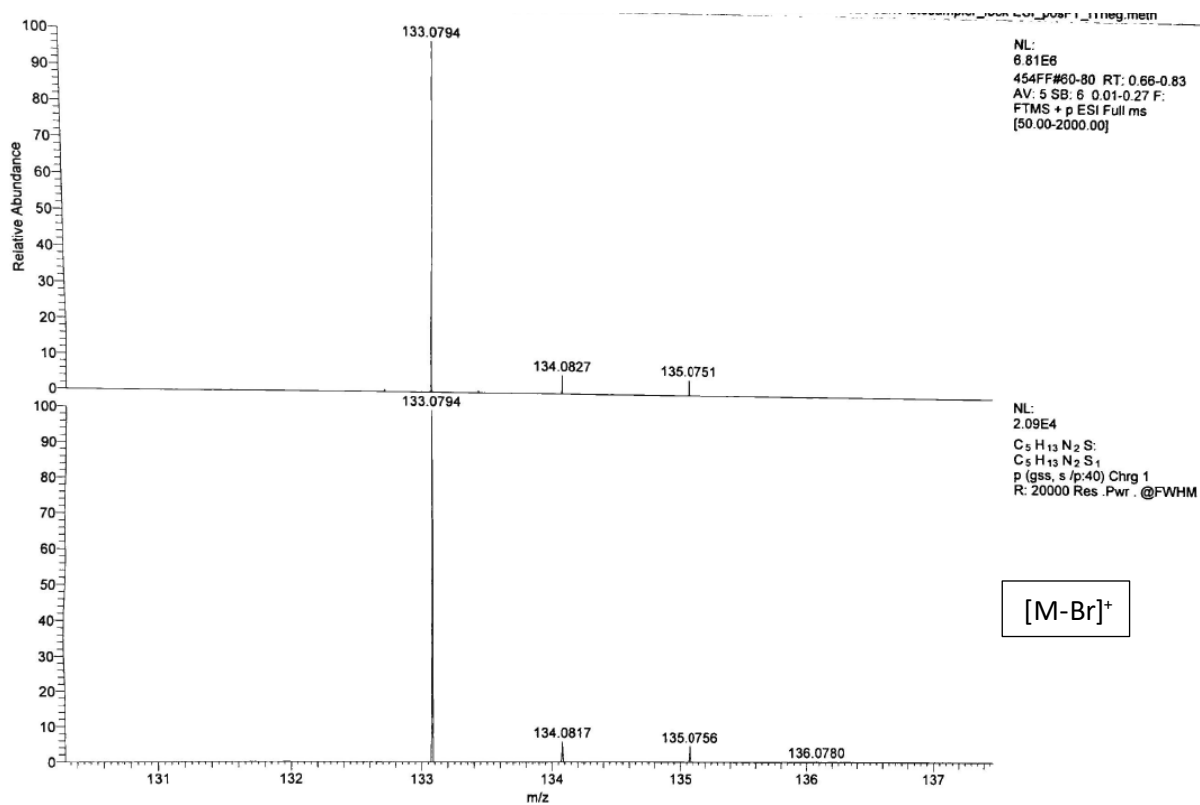

3

4 **Figure S11.** ESI(+)-MS (top) of *S-tert*-butyl isothiuronium bromide **6** and calculated isotope pattern

5 (bottom).



794ff #8 RT: 0.52 AV: 1 NL: 9.31E6  
T: + c EI Full ms [ 49.50-1000.50]

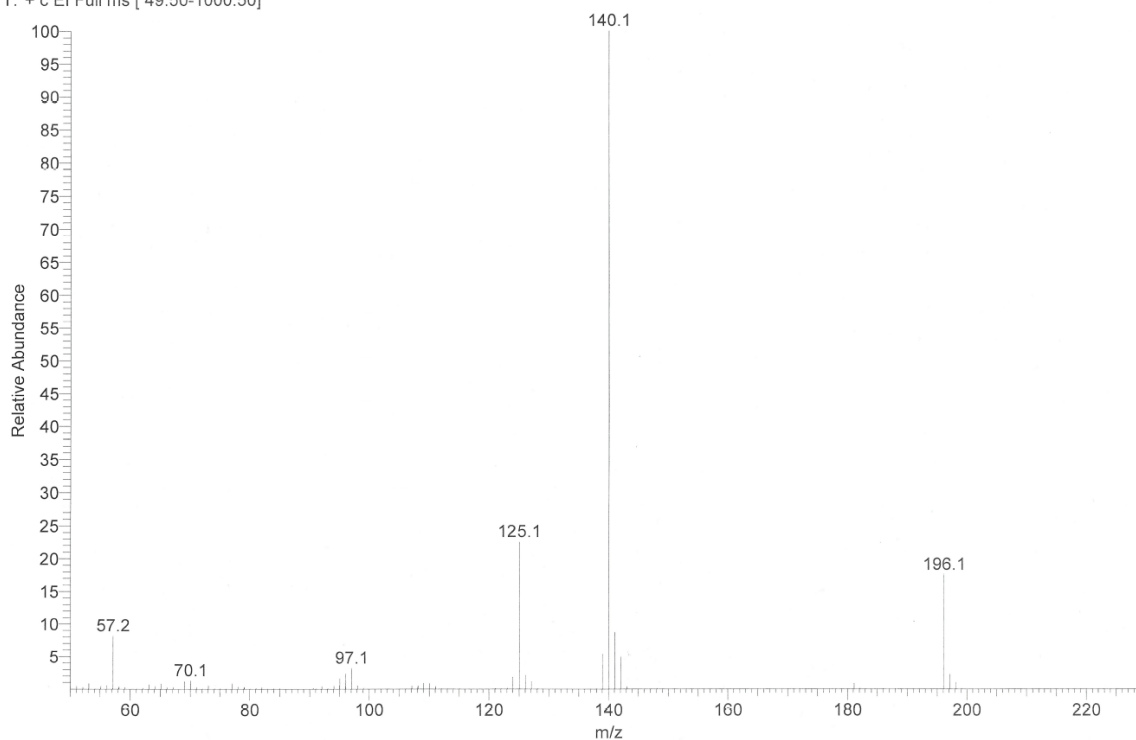

1

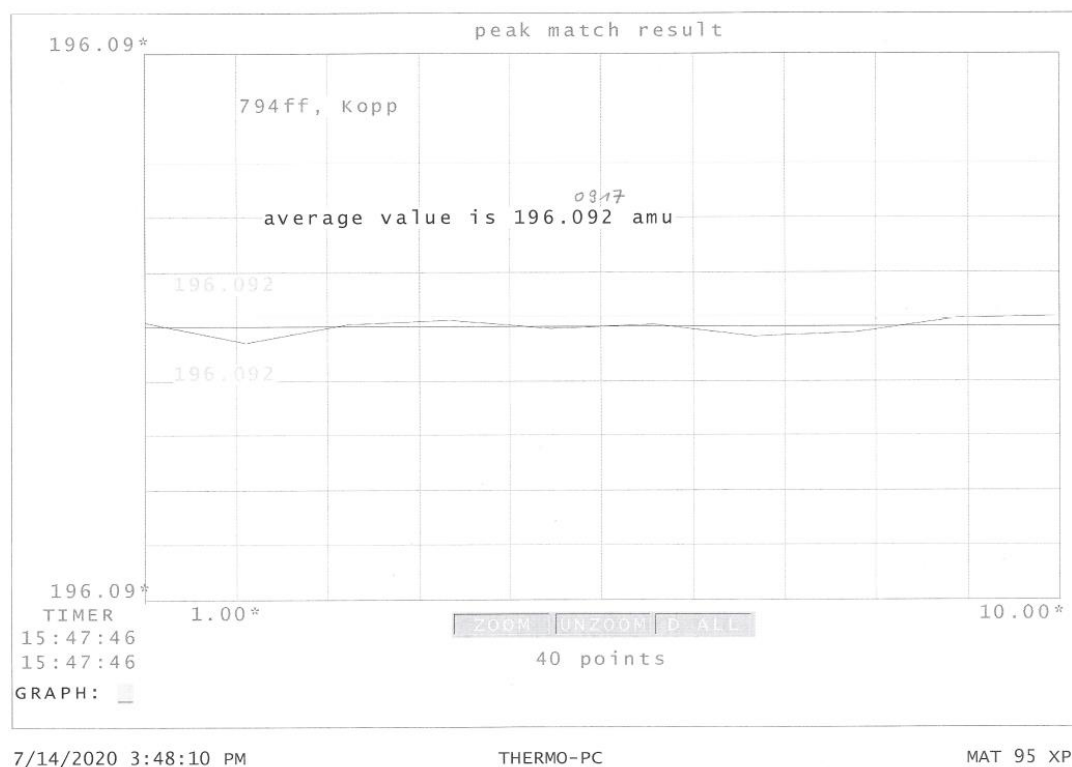

2

3 **Figure S12.** EI(+)-MS (top) of 4-methoxy-*tert*-butylthiobenzene **7** and average value of exact mass  
4 (bottom).



792ff #9 RT: 0.63 AV: 1 NL: 2.61E6  
T: + c EI Full ms [ 49.50-1000.50]

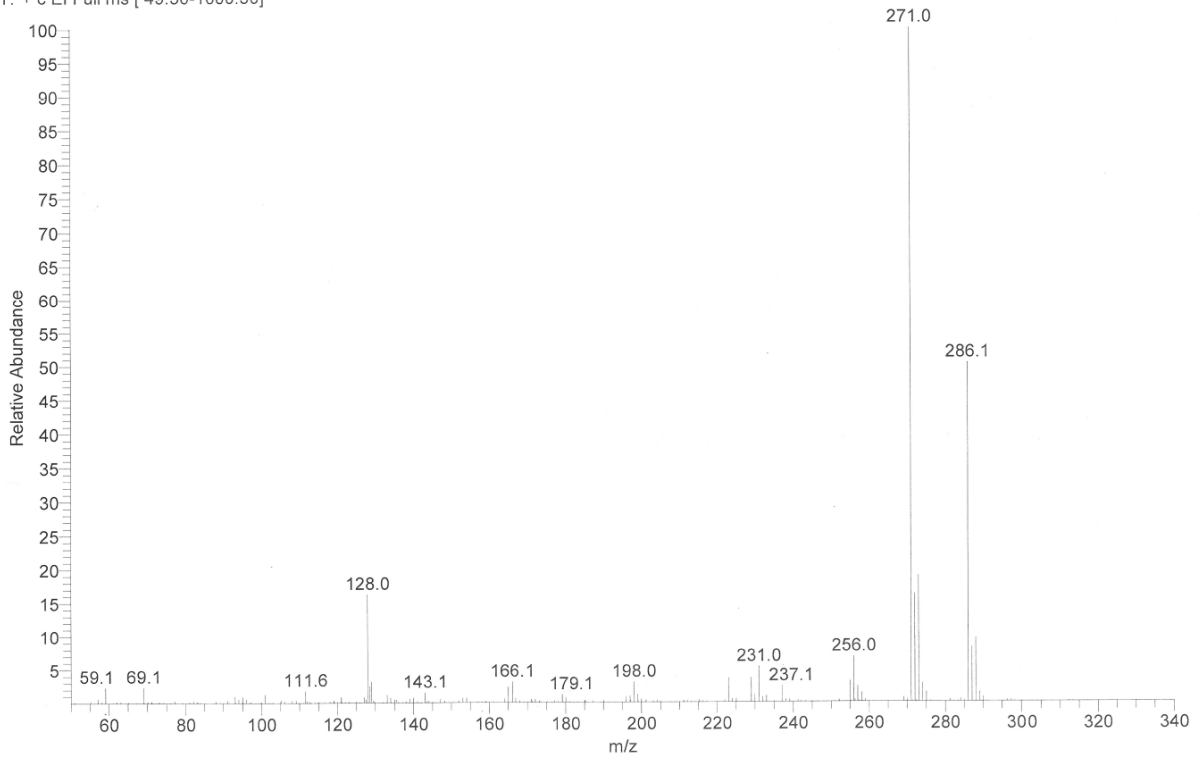

1

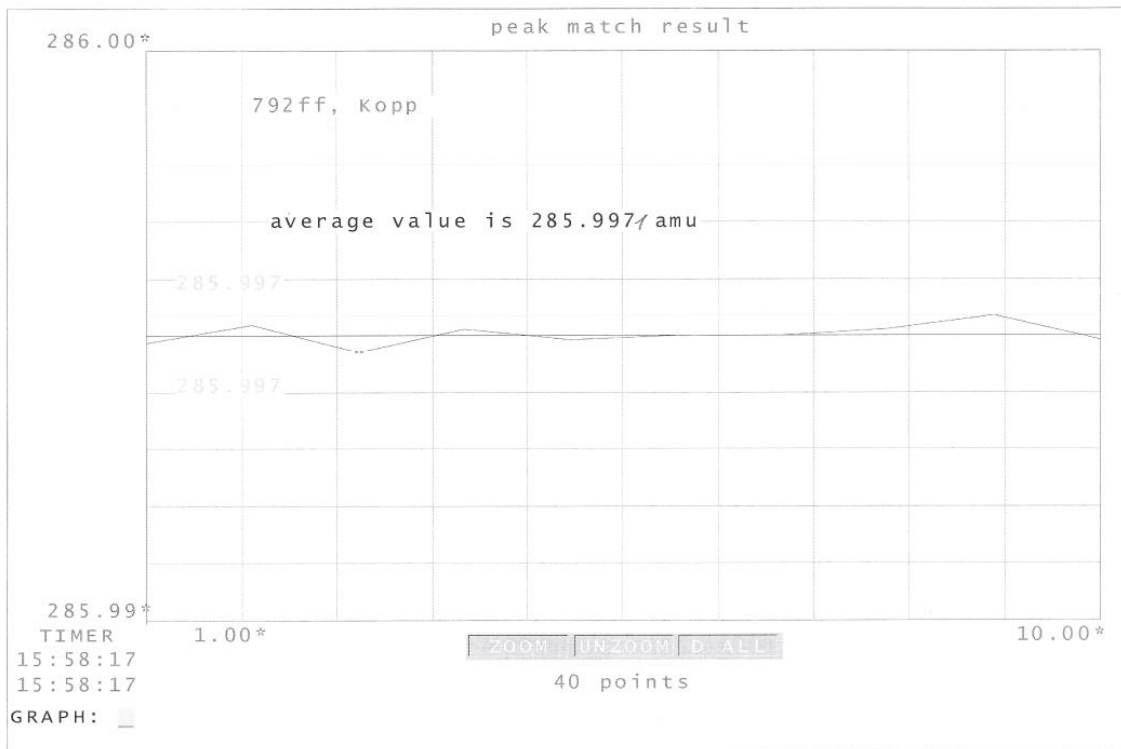

7/14/2020 3:58:34 PM

THERMO-PC

MAT 95 XP

2

3 **Figure S14.** EI(+)-MS (top) of **1a** and average value of exact mass (bottom).

4

## 1 2. Condition screening

2

### 3 Screening of conditions with other substrates

4 The analysis of the reaction mixtures was carried out via  $^1\text{H-NMR}$ , products were identified via  
5 comparison of literature values for 1,4-bis(*tert*-butylthio)benzene<sup>4</sup>, 4-chlorophenol<sup>5</sup>, 4-fluorophenol<sup>6</sup>,  
6 and 4-(*tert*-butylthio)nitrobenzene<sup>7</sup>.

7

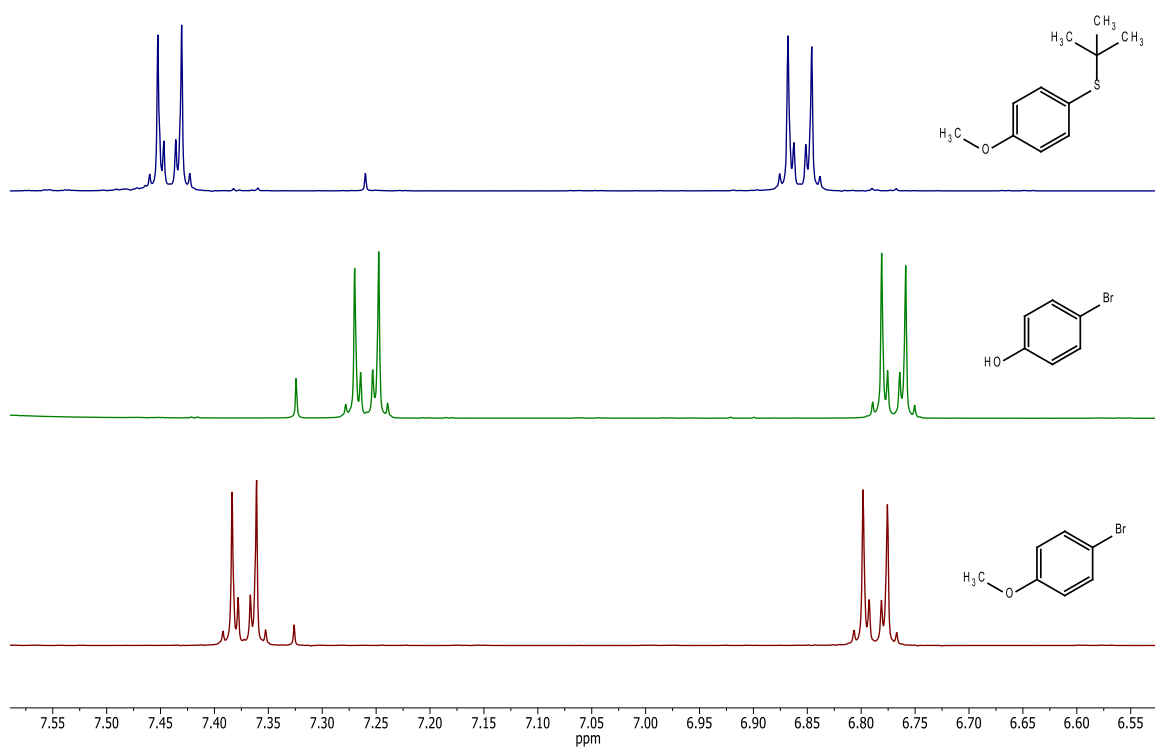

8

9 **Figure S15.** Reference spectra of 4-bromoanisole (bottom), 4-bromophenol (middle) and 4-methoxy-  
10 *tert*-butylthiobenzene (top).

11

12 **Table S1.** Reaction conditions.

| Reaction No. | Temperature [°C] | ligand                | base                   | Solvent |
|--------------|------------------|-----------------------|------------------------|---------|
| 1            | 50               | $\text{Ph}_3\text{P}$ | $\text{KO}^t\text{Bu}$ | DMF     |
| 2            | 50               | XPhos                 | $\text{KO}^t\text{Bu}$ | DMF     |
| 3            | 50               | Xantphos              | $\text{KO}^t\text{Bu}$ | DMF     |

|       |    |                                |                                 |                   |
|-------|----|--------------------------------|---------------------------------|-------------------|
| 4     | 80 | Ph <sub>3</sub> P              | KO <sup>t</sup> Bu              | DMF               |
| 5     | 80 | XPhos                          | KO <sup>t</sup> Bu              | DMF               |
| 6     | 80 | Xantphos                       | KO <sup>t</sup> Bu              | DMF               |
| 7     | 80 | dppf                           | KO <sup>t</sup> Bu              | DMF               |
| 8     | 80 | SPhos                          | KO <sup>t</sup> Bu              | DMF               |
| 9     | 80 | BrettPhos                      | KO <sup>t</sup> Bu              | DMF               |
| 10    | 80 | <sup>n</sup> Bu <sub>3</sub> P | KO <sup>t</sup> Bu              | DMF               |
| 11    | 80 | none                           | KO <sup>t</sup> Bu              | DMF               |
| 12*   | 80 | none                           | KO <sup>t</sup> Bu              | DMF               |
| 13*   | 80 | SPhos                          | KO <sup>t</sup> Bu              | DMF               |
| 14    | 80 | Ph <sub>3</sub> P              | KO <sup>t</sup> Bu              | <sup>n</sup> BuOH |
| 15    | 80 | Ph <sub>3</sub> P              | K <sub>2</sub> CO <sub>3</sub>  | DMF               |
| 16    | 80 | Ph <sub>3</sub> P              | Cs <sub>2</sub> CO <sub>3</sub> | DMF               |
| 17    | 80 | Ph <sub>3</sub> P              | K <sub>3</sub> PO <sub>4</sub>  | DMF               |
| 18**  | 80 | Ph <sub>3</sub> P              | KO <sup>t</sup> Bu              | DMF               |
| 19*** | 80 | Ph <sub>3</sub> P              | K <sub>2</sub> CO <sub>3</sub>  | DMF               |
| 20*** | 80 | Ph <sub>3</sub> P              | K <sub>3</sub> PO <sub>4</sub>  | DMF               |

1 \*without Pd<sub>2</sub>dba<sub>3</sub>. \*\*reduced amounts of base to 2.4 eq. \*\*\*addition of 10mol% of 18-C-6.

2

1 2.2 <sup>1</sup>H-NMR data

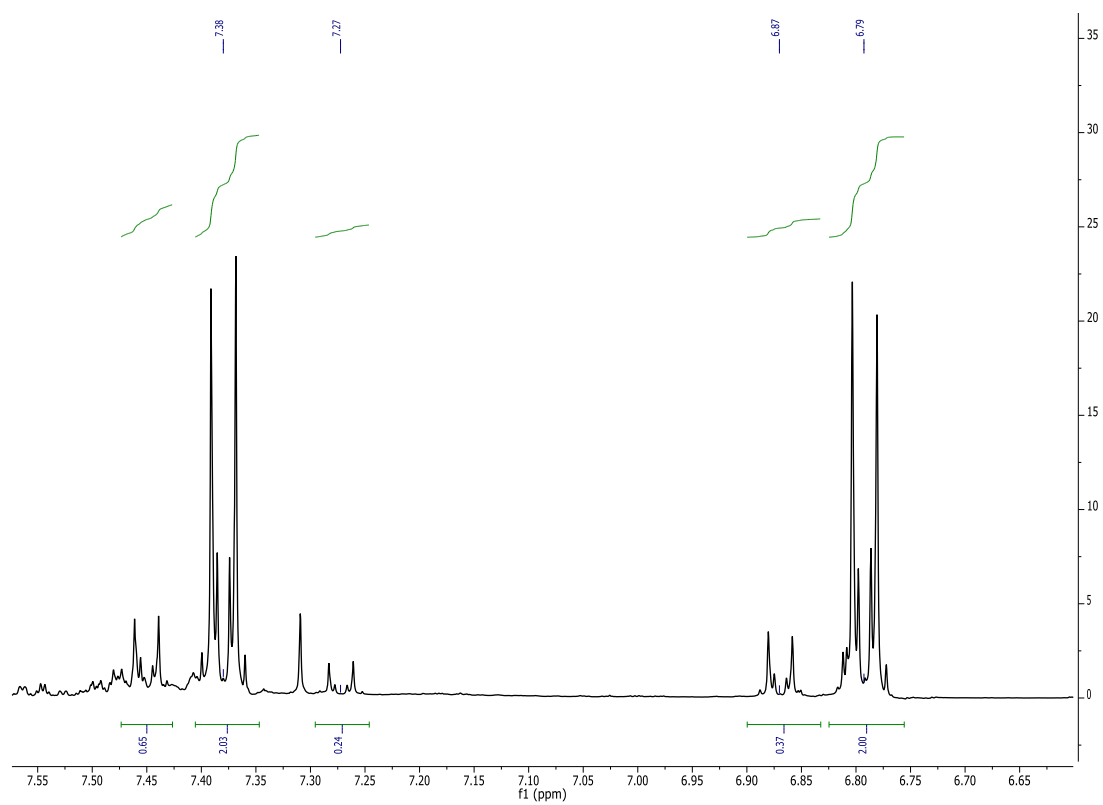

2

3 **Figure S16.** <sup>1</sup>H-NMR (400 MHz, 298 K, CDCl<sub>3</sub>) of reaction 1.

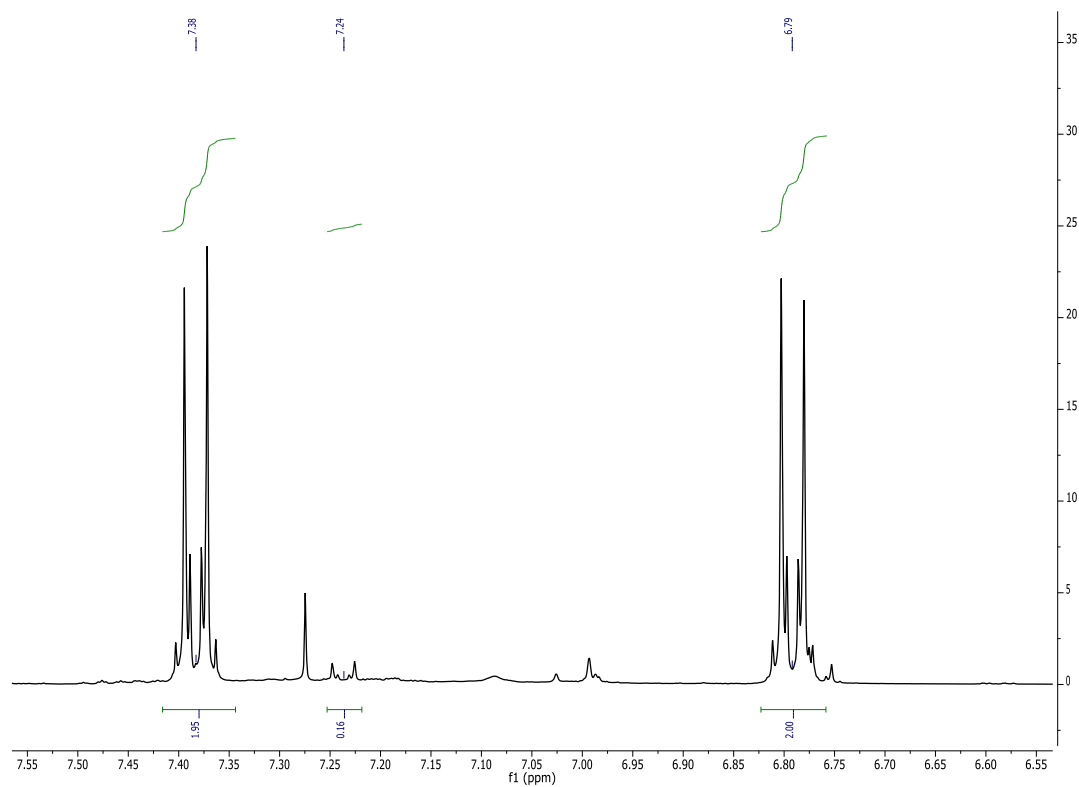

4

5 **Figure S17.** <sup>1</sup>H-NMR (400 MHz, 298 K, CDCl<sub>3</sub>) of Reaction 2.

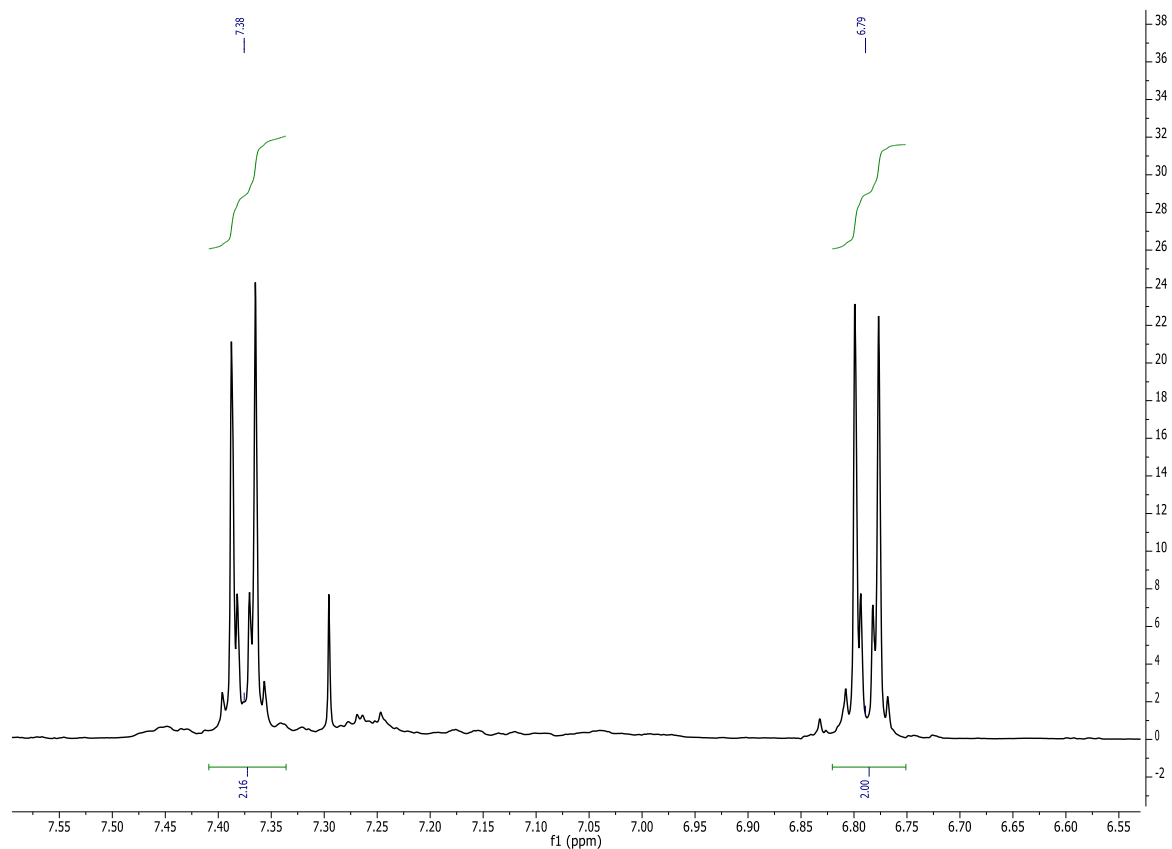

1

2 **Figure S18.**  $^1\text{H-NMR}$  (400 MHz, 298 K,  $\text{CDCl}_3$ ) of reaction 3.

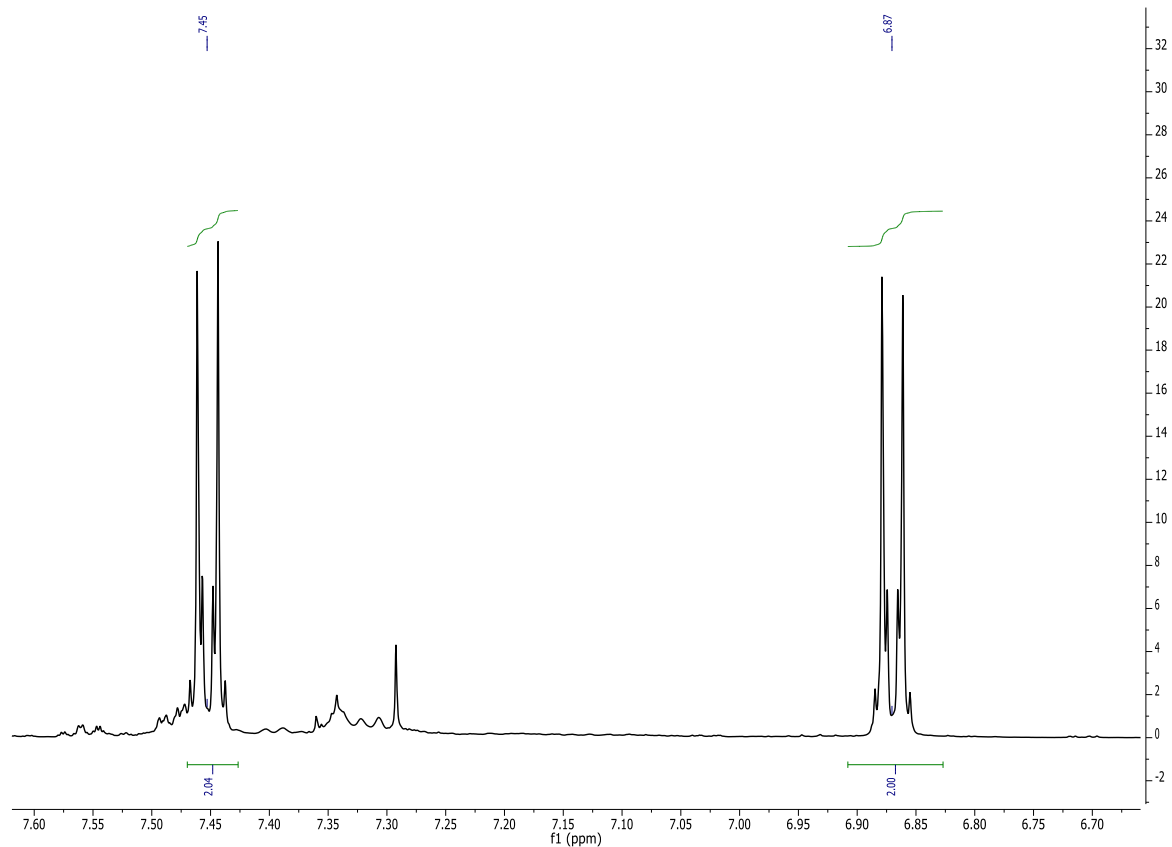

3

4 **Figure S19.**  $^1\text{H-NMR}$  (500 MHz, 298 K,  $\text{CDCl}_3$ ) of reaction 4.

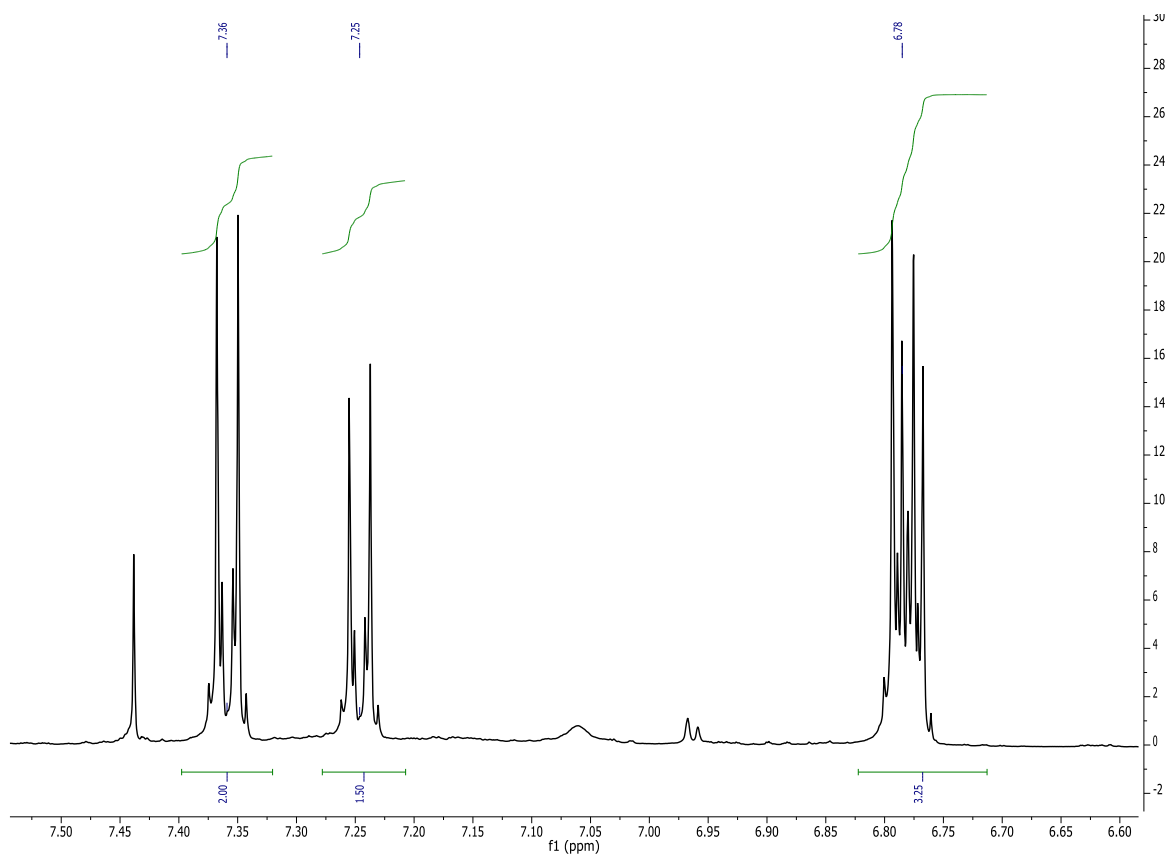

1

2 **Figure S20.** <sup>1</sup>H-NMR (500 MHz, 298 K, CDCl<sub>3</sub>) of reaction 5.

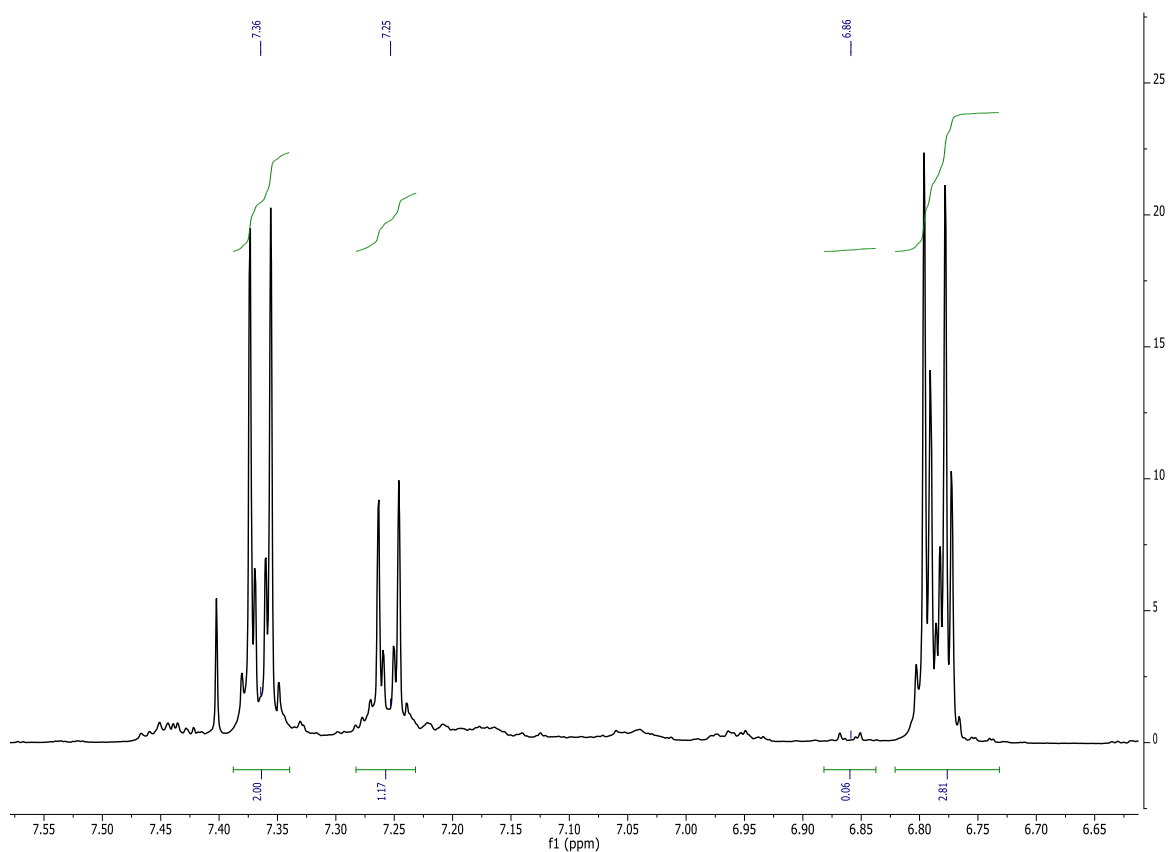

3

4 **Figure S21.** <sup>1</sup>H-NMR (500 MHz, 298 K, CDCl<sub>3</sub>) of reaction 6.



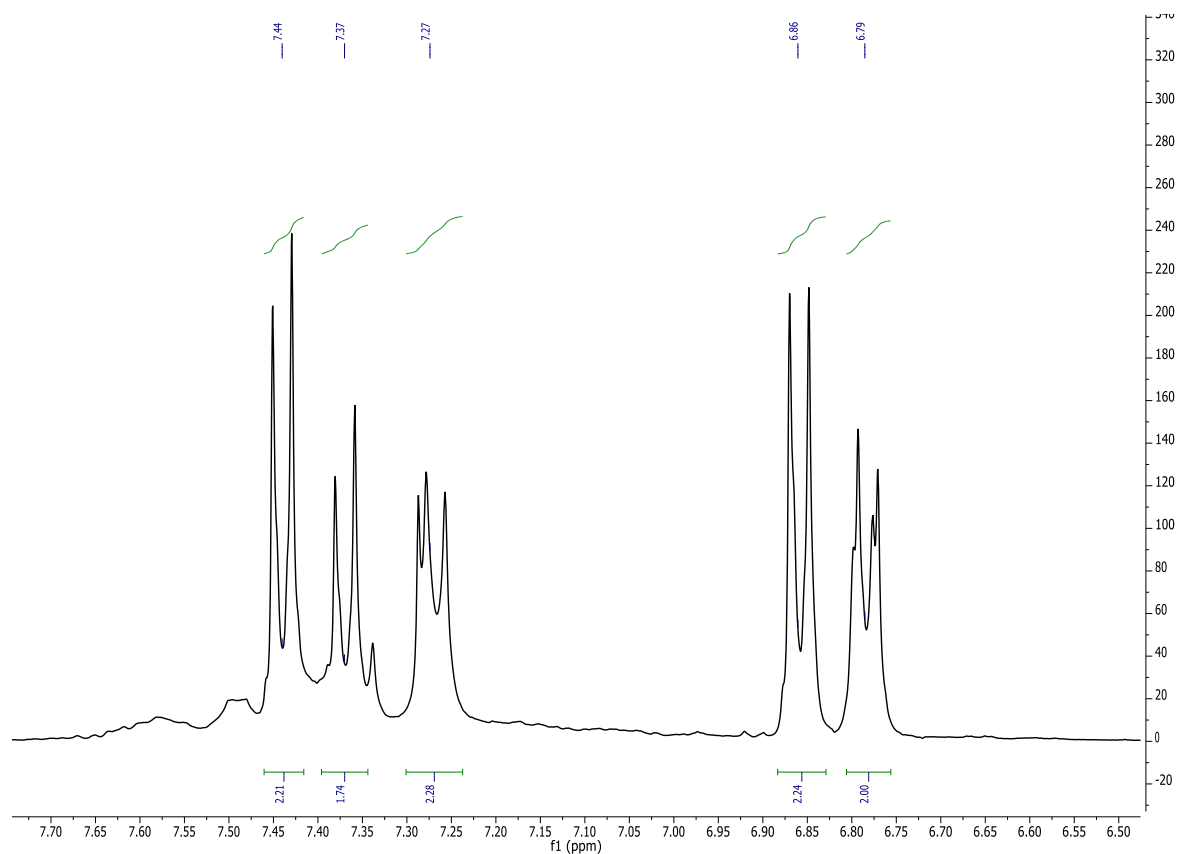

1

2 **Figure S22.**  $^1\text{H-NMR}$  (400 MHz, 298 K,  $\text{CDCl}_3$ ) of reaction 7.

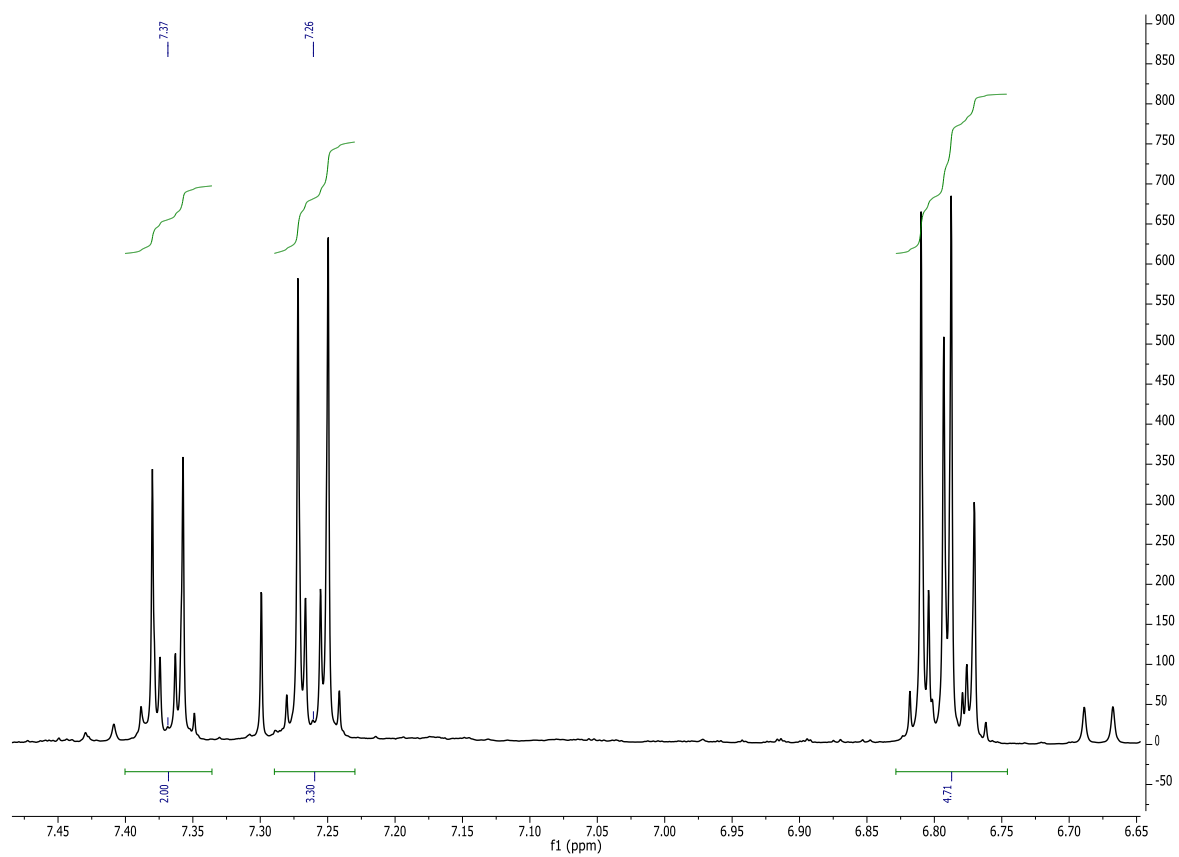

3

4 **Figure S23.**  $^1\text{H-NMR}$  (400 MHz, 298 K,  $\text{CDCl}_3$ ) of reaction 8.

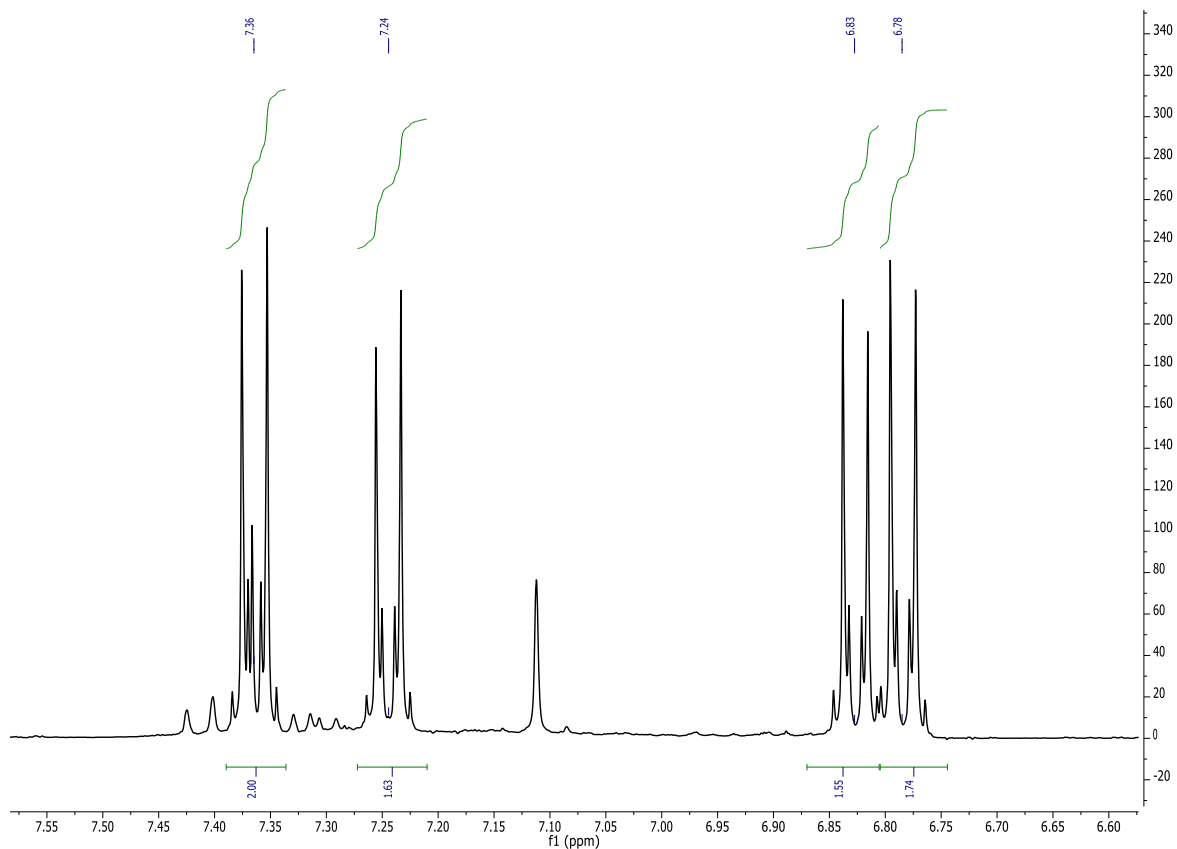

1

2 **Figure S24.**  $^1\text{H-NMR}$  (400 MHz, 298 K,  $\text{CDCl}_3$ ) of reaction 9.

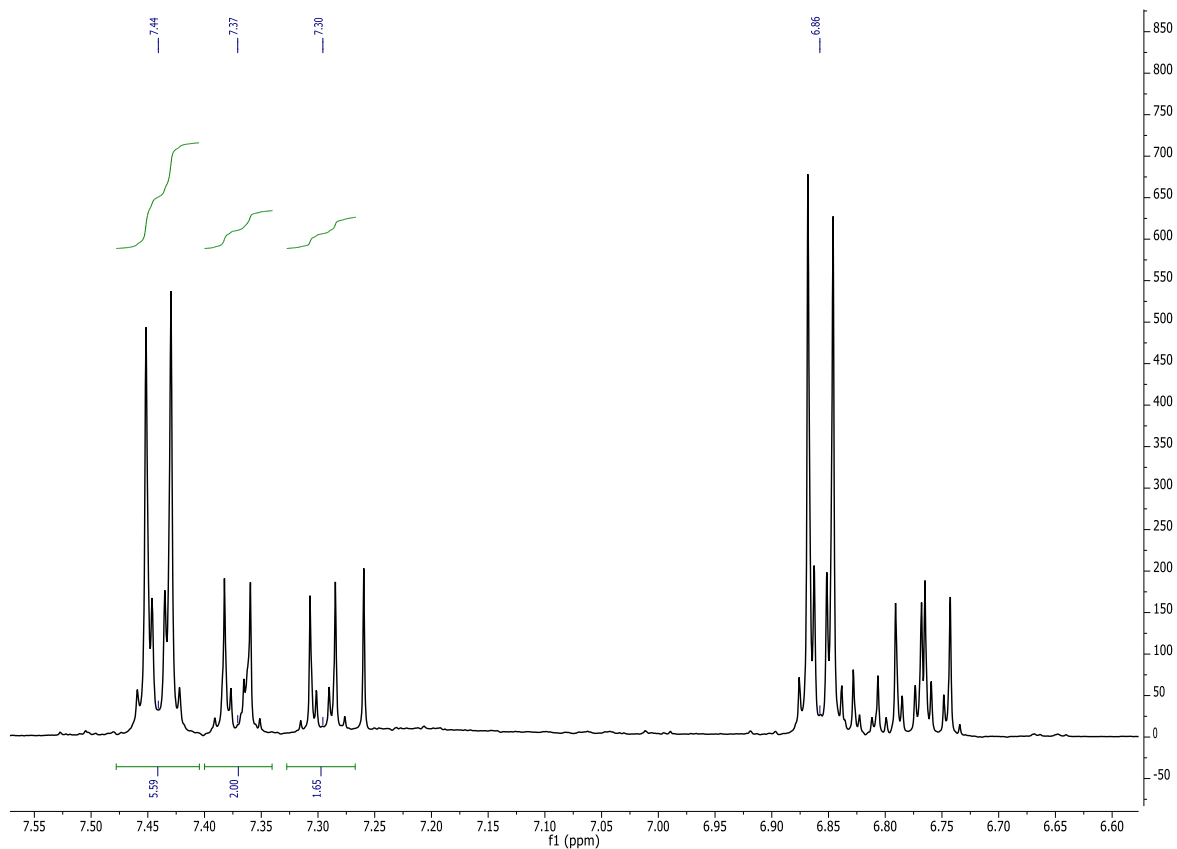

3

4 **Figure S25.**  $^1\text{H-NMR}$  (400 MHz, 298 K,  $\text{CDCl}_3$ ) of reaction 10.

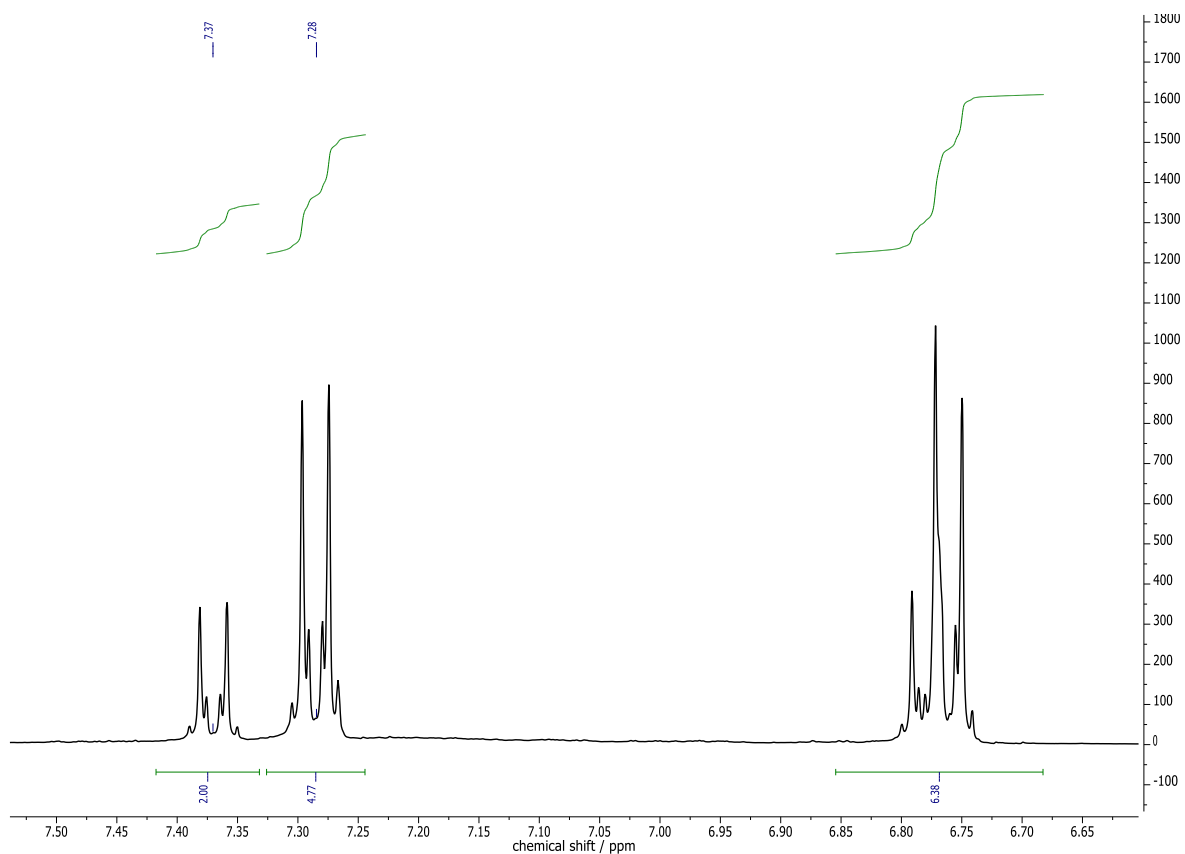

2 **Figure S26.**  $^1\text{H-NMR}$  (400 MHz, 298 K,  $\text{CDCl}_3$ ) of reaction 11.

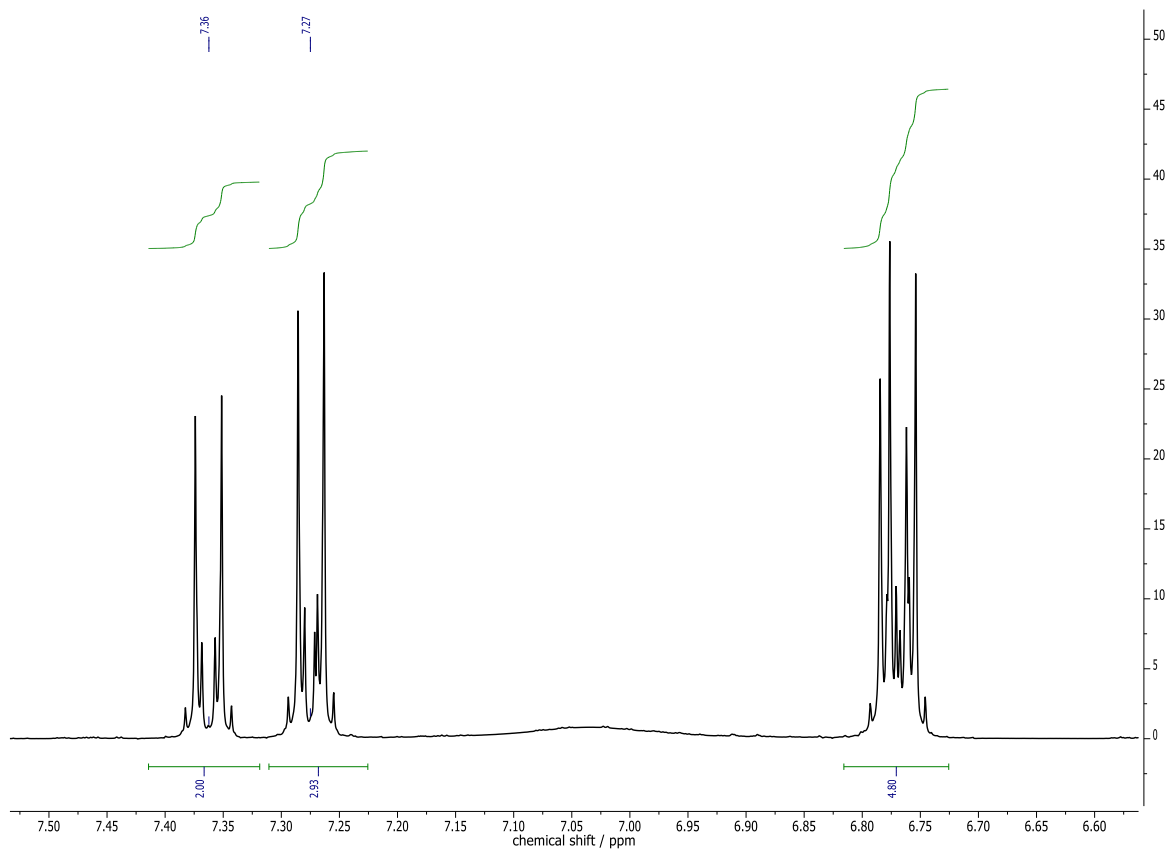

4 **Figure S27.**  $^1\text{H-NMR}$  (400 MHz, 298 K,  $\text{CDCl}_3$ ) of reaction 12.

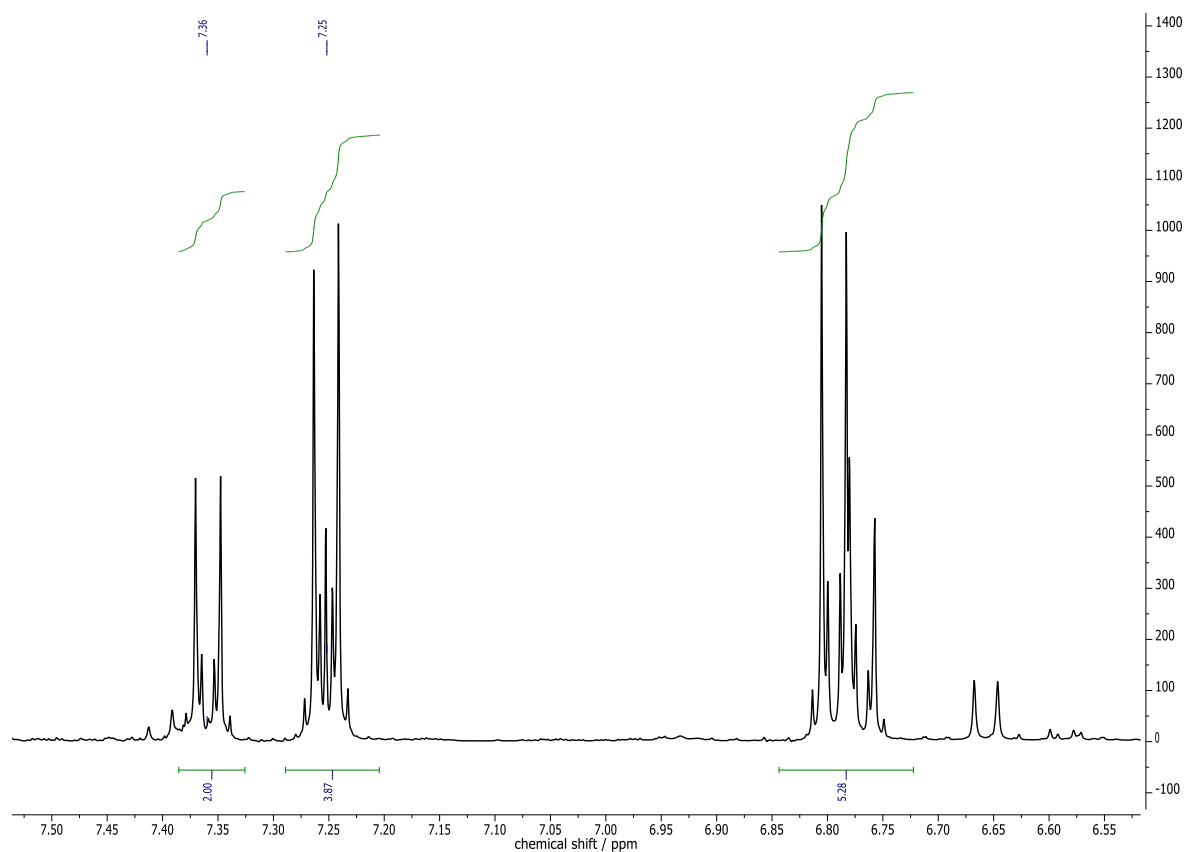

1

2 **Figure S28.** <sup>1</sup>H-NMR (400 MHz, 298 K, CDCl<sub>3</sub>) of reaction 13.

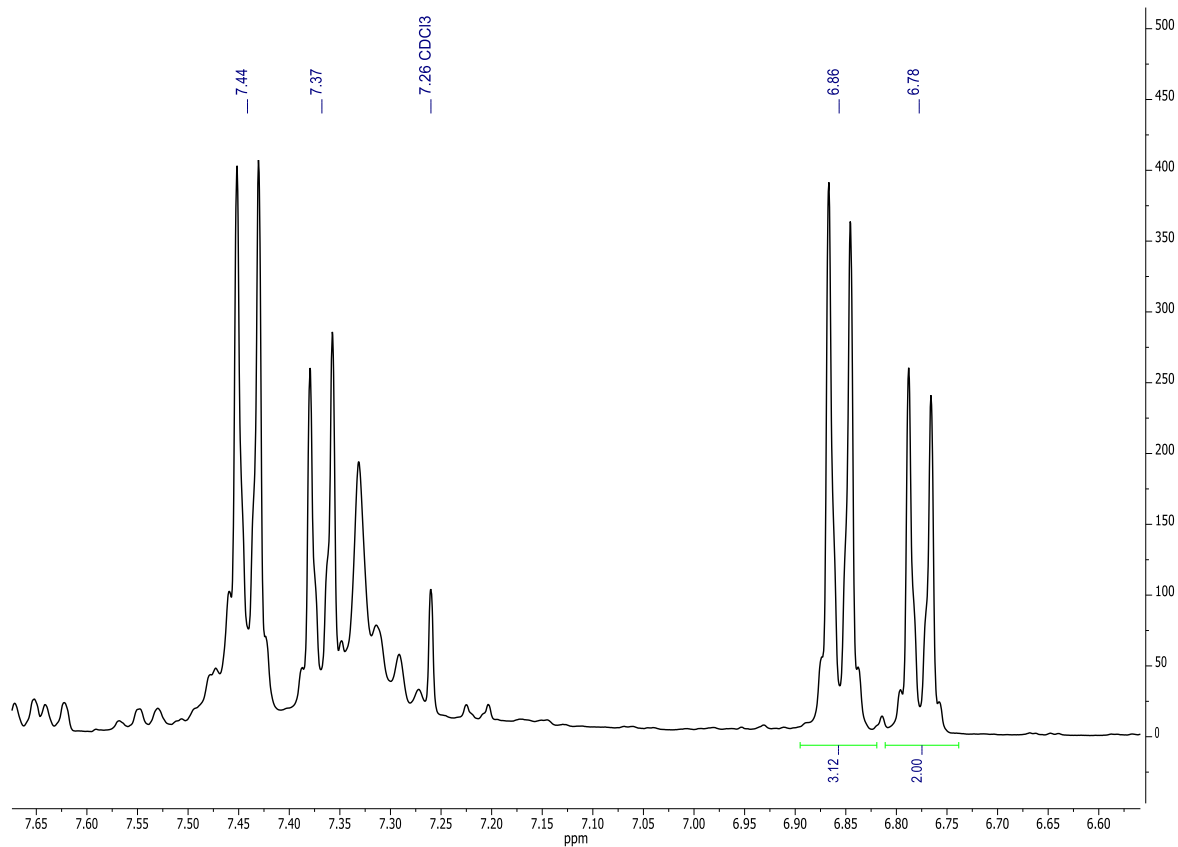

3

4 **Figure S29.** <sup>1</sup>H-NMR (400 MHz, 298 K, CDCl<sub>3</sub>) of reaction 14.

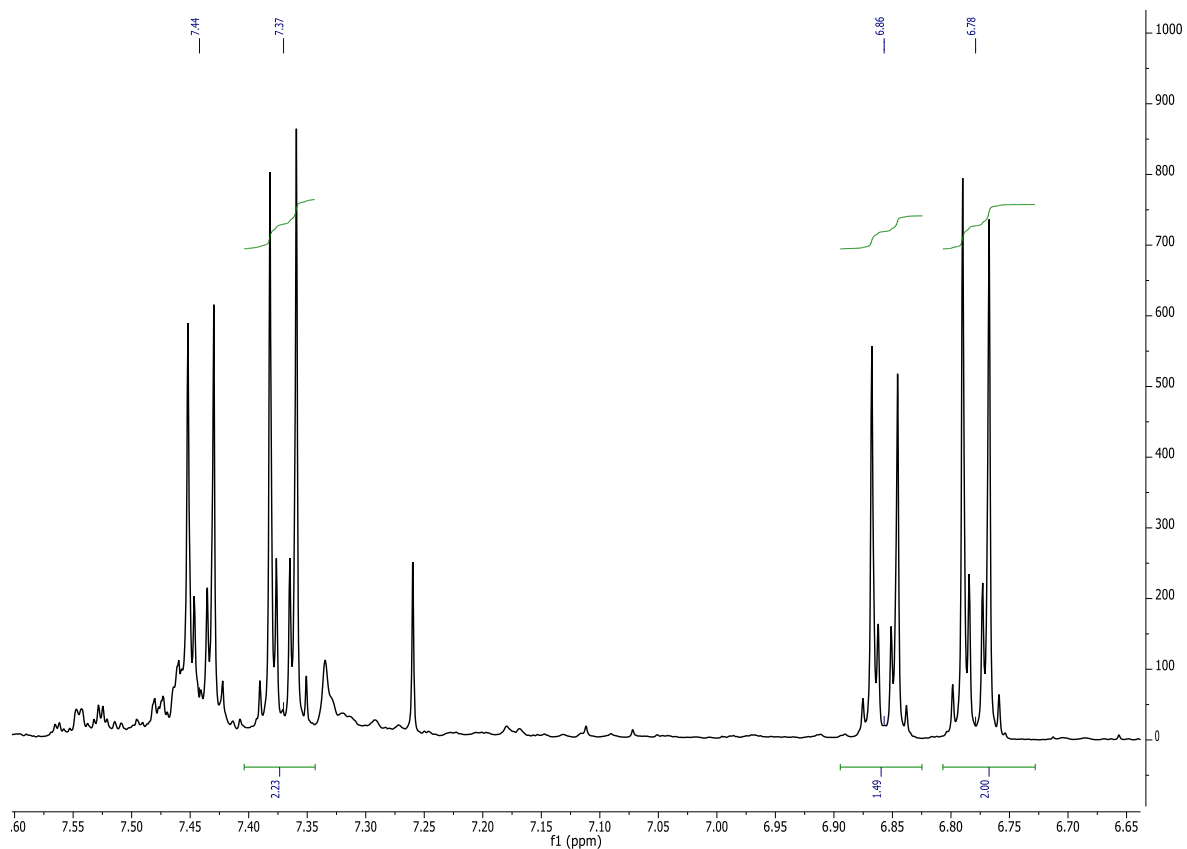

1

2 **Figure S30**  $^1\text{H-NMR}$  (400 MHz, 298 K,  $\text{CDCl}_3$ ) of reaction 15.

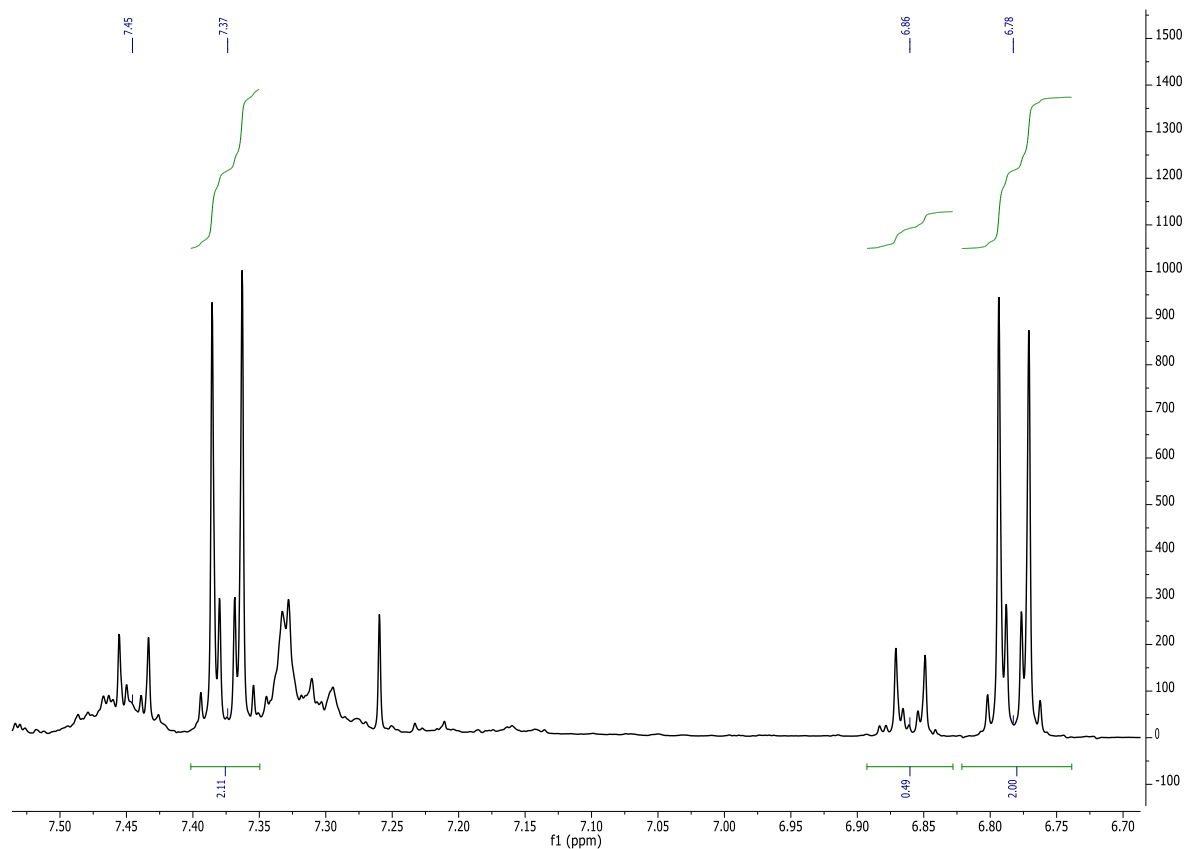

3

4 **Figure S31.**  $^1\text{H-NMR}$  (400 MHz, 298 K,  $\text{CDCl}_3$ ) of reaction 16.

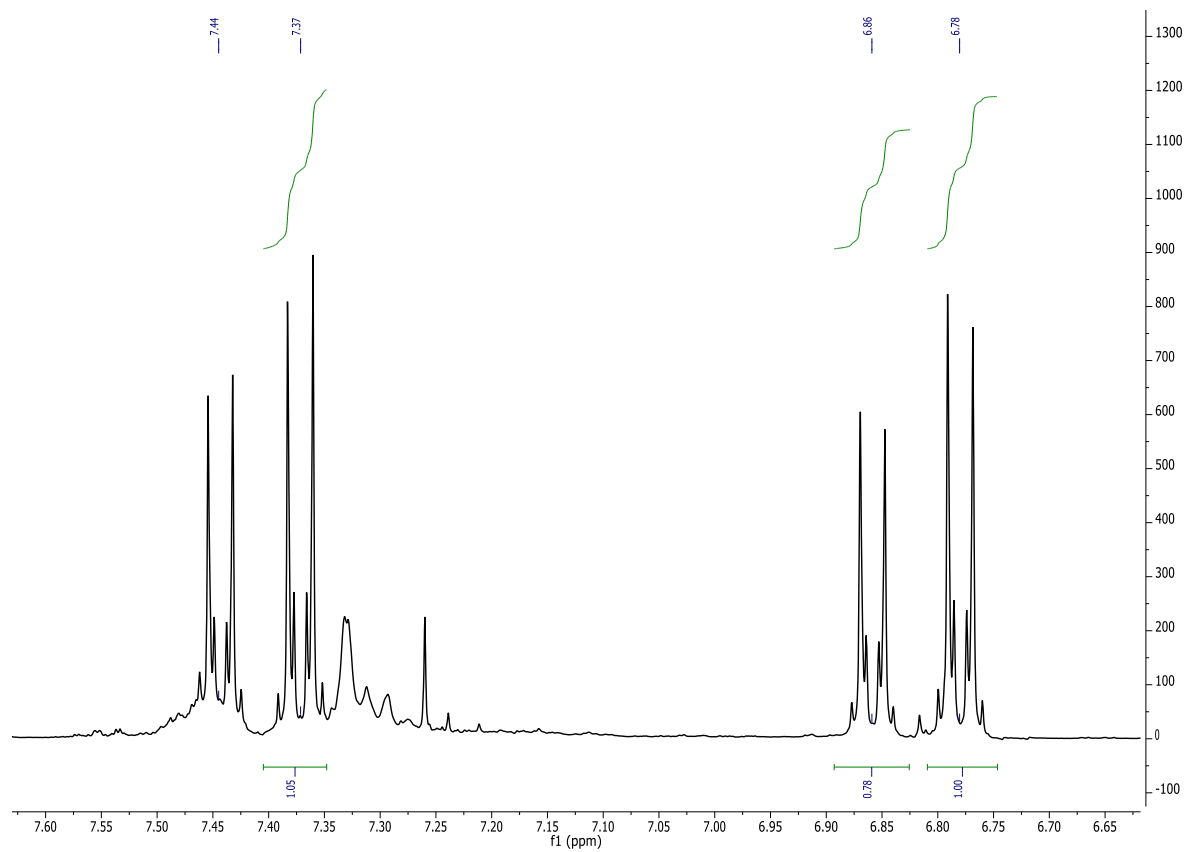

2 **Figure S32.**  $^1\text{H-NMR}$  (400 MHz, 298 K,  $\text{CDCl}_3$ ) of reaction 17.

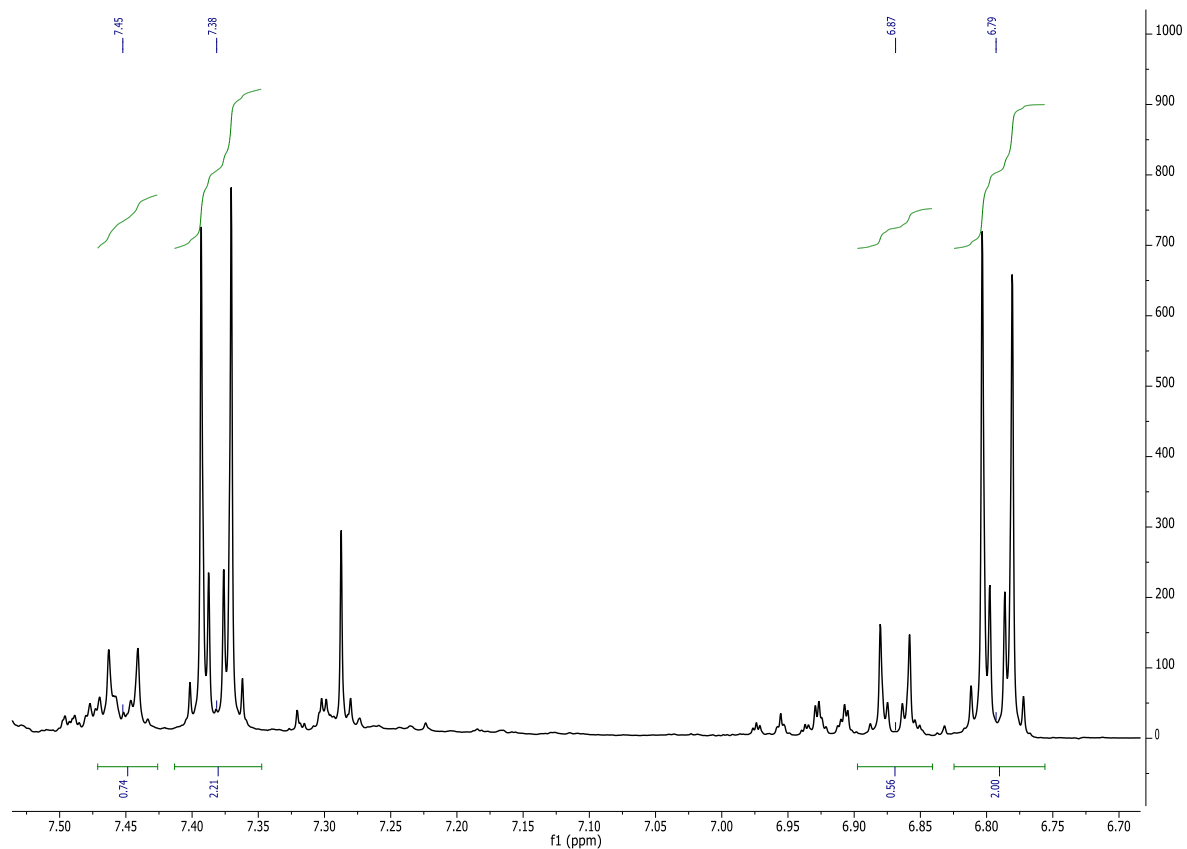

4 **Figure S33.**  $^1\text{H-NMR}$  (400 MHz, 298 K,  $\text{CDCl}_3$ ) of reaction 18.

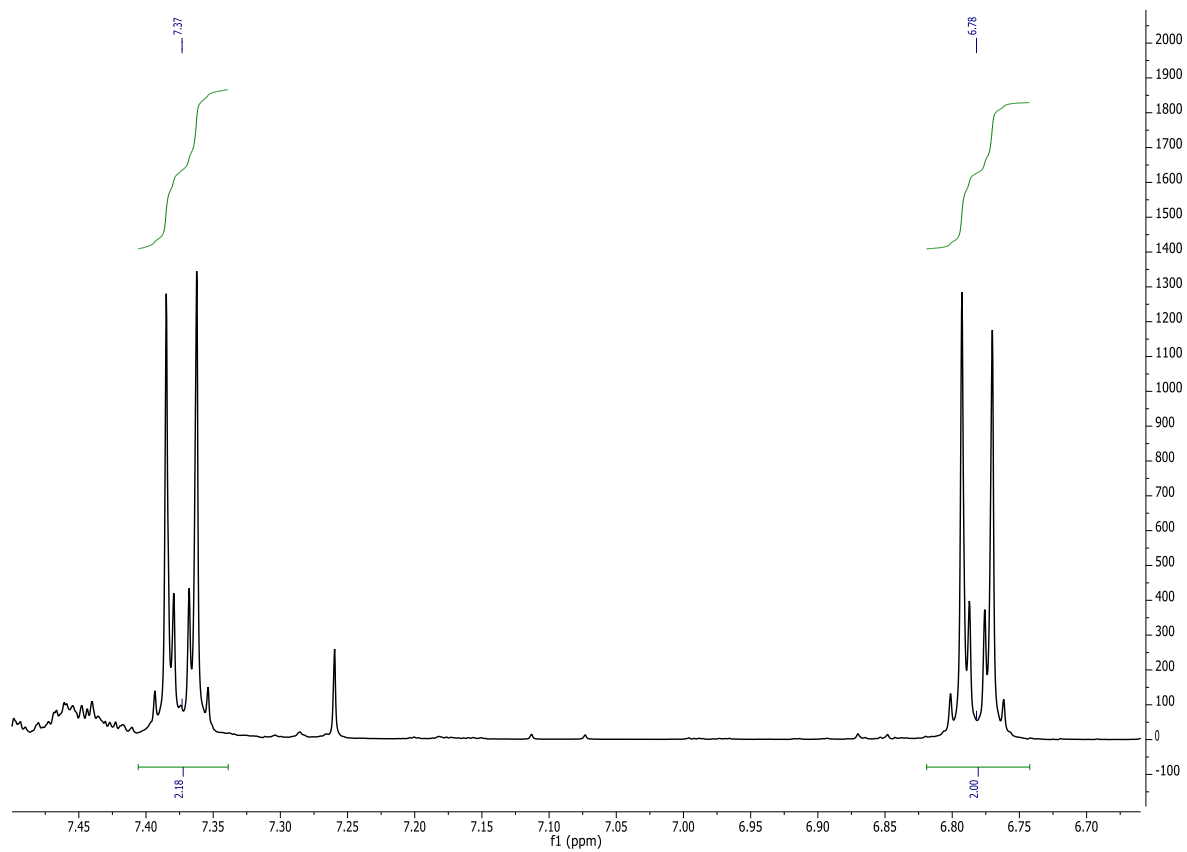

1

2 **Figure S34.**  $^1\text{H-NMR}$  (400 MHz, 298 K,  $\text{CDCl}_3$ ) of reaction 19.

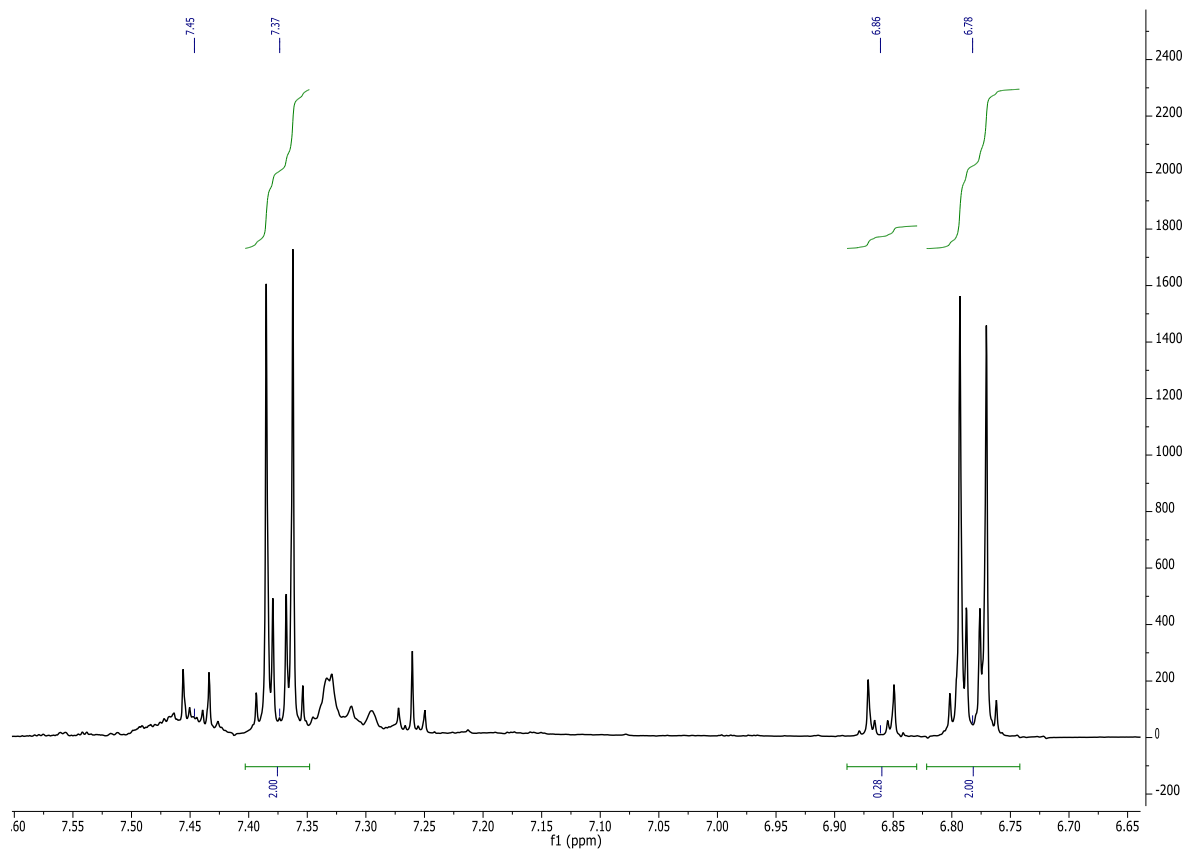

3

4 **Figure S35.**  $^1\text{H-NMR}$  (400 MHz, 298 K,  $\text{CDCl}_3$ ) of reaction 20.

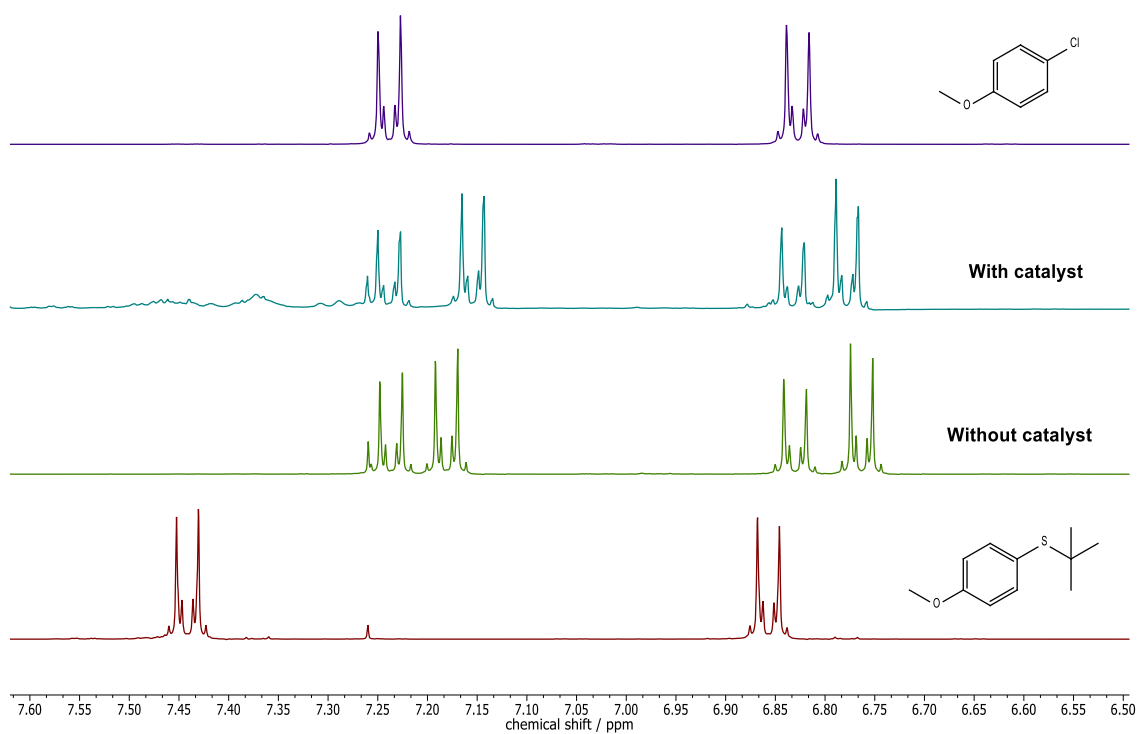

**Figure S36.**  $^1\text{H-NMR}$  (400 MHz, 298 K,  $\text{CDCl}_3$ ) of the reactions with 4-chloroanisole.

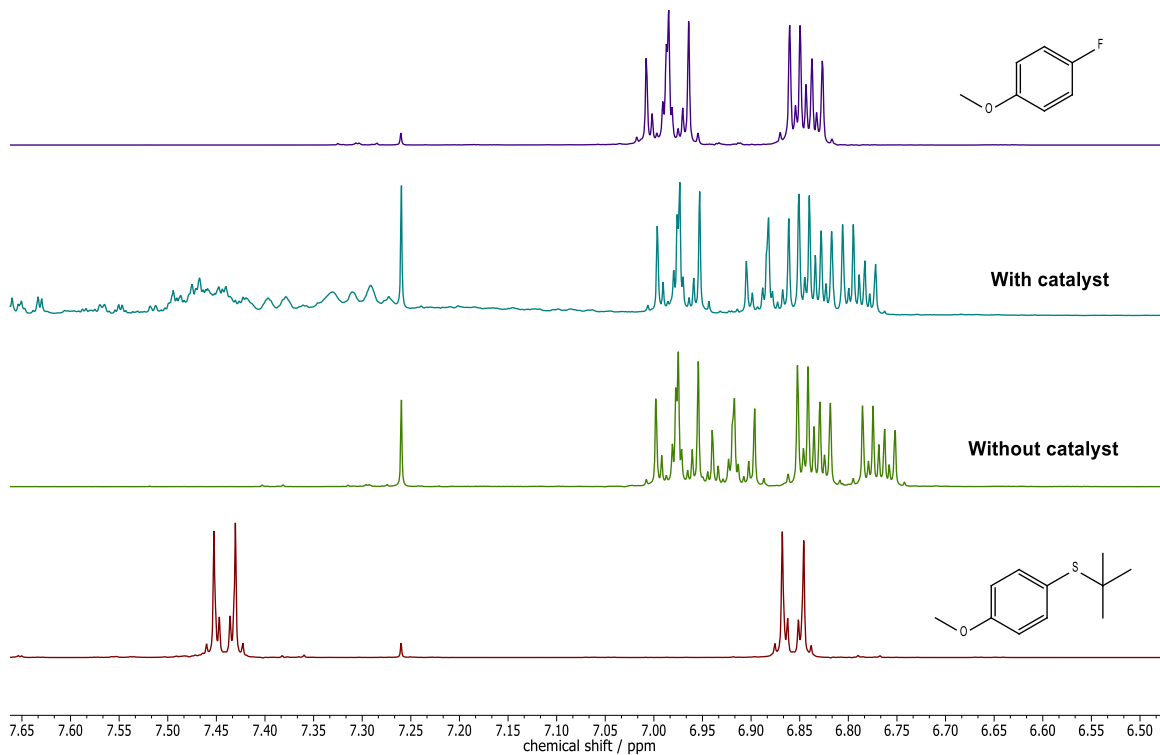

**Figure S37.**  $^1\text{H-NMR}$  (400 MHz, 298 K,  $\text{CDCl}_3$ ) of the reactions with 4-fluoroanisole.



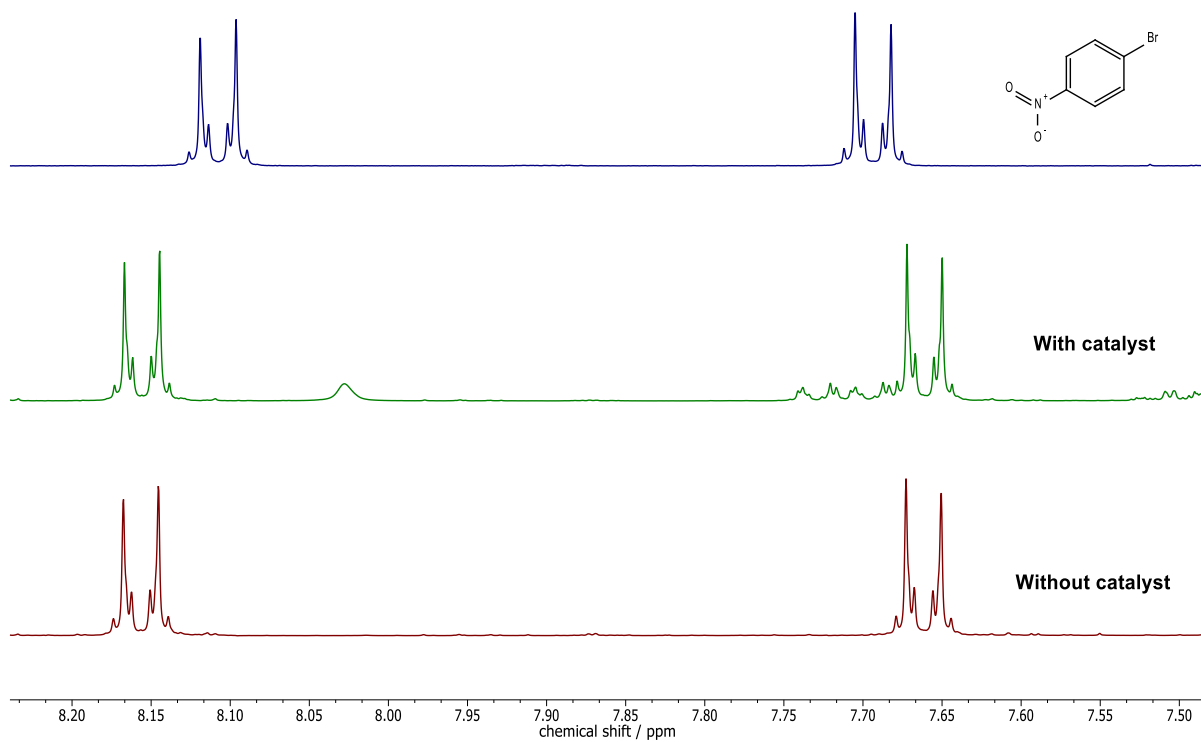

**Figure S38.**  $^1\text{H-NMR}$  (400 MHz, 298 K,  $\text{CDCl}_3$ ) of the reactions with 4-nitrobromobenzene

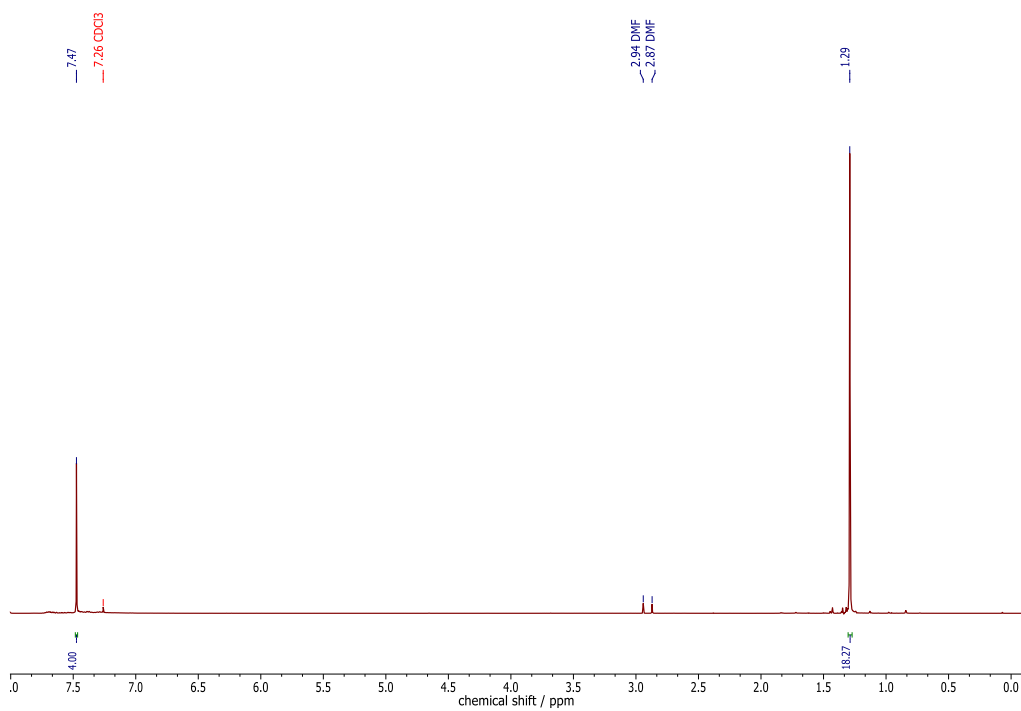

**Figure S39.**  $^1\text{H-NMR}$  (400 MHz, 298 K,  $\text{CDCl}_3$ ) of the reaction with 1,4-diiodobenzene at 50 °C.

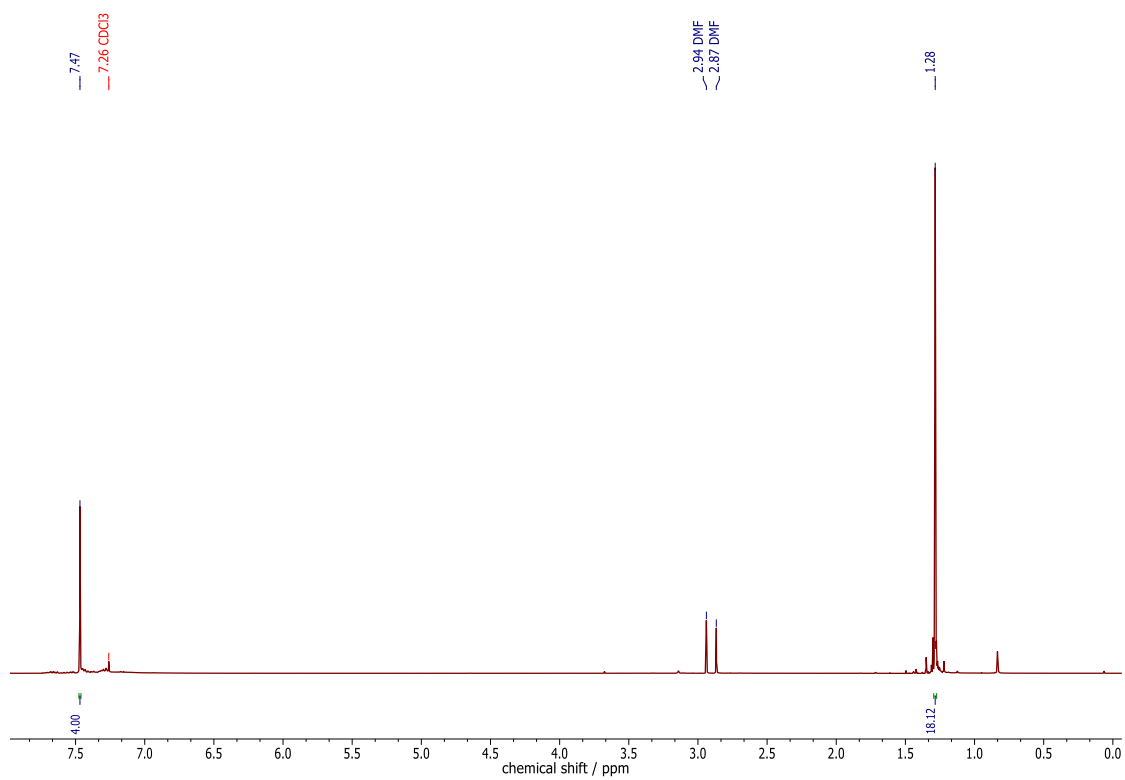

1

2 **Figure S40.** <sup>1</sup>H-NMR (400 MHz, 298 K, CDCl<sub>3</sub>) of the reaction with 1,4-diiodobenzene at 80 °C.

3

### 1 3 Literature

- 2 (1) Fulmer, G. R.; Miller, A. J. M.; Sherden, N. H.; Gottlieb, H. E.; Nudelman, A.; Stoltz, B. M.;  
3 Bercaw, J. E.; Goldberg, K. I.; Gan, R.; Apiezon, H. NMR Chemical Shifts of Trace Impurities :  
4 Common Laboratory Solvents , Organics , and Gases in Deuterated Solvents Relevant to the  
5 Organometallic Chemist. *Organometallics* **2010**, *29*, 2176–2179.
- 6 (2) Wang, L.; Zhou, W.-Y.; Chen, S.-C.; He, M.-Y.; Chen, Q. A Highly Efficient Palladium-Catalyzed  
7 One-Pot Synthesis of Unsymmetrical Aryl Alkyl Thioethers under Mild Conditions in Water.  
8 *Adv. Synth. Catal.* **2012**, *354*, 839–845.
- 9 (3) Reddy, T. J.; Iwama, T.; Halpern, H. J.; Rawal, V. H. General Synthesis of Persistent Trityl  
10 Radicals for EPR Imaging of Biological Systems. *J. Org. Chem.* **2002**, 4635–4639.
- 11 (4) Cogolli, P.; Testafari, L.; Tingoli, M.; Tiecco, M.; *J. Org. Chem.* **1979**, *44*, 2636 – 2642.
- 12 (5) Bovonsombat, P.; Ali, Rameez; K., Chiraphorn; L., Juthamard; P., Kawin; Aphimanchindakul, S.;  
13 Pungcharoenpong, N.; Timsuea, N.; Arunrat, A.; Punpongjareorn, N.; *Tetrahedron* **2010**, *66*,  
14 6928 – 6935.
- 15 (6) Furuya, T.; Kaiser, H.; Ritter, T.; *Angew. Chem. Int. Ed.* **2008**, *47*, 5993 – 5996.
- 16 (7) Wang, L.; Zhou, W.-Y.; Chen, S.-C.; He, M.-Y.; Chen, Q. A Highly Efficient Palladium-Catalyzed  
17 One-Pot Synthesis of Unsymmetrical Aryl Alkyl Thioethers under Mild Conditions in Water.  
18 *Adv. Synth. Catal.* **2012**, *354*, 839–845.
